# 1       **What does mitogenomics tell us about the** 2       **evolutionary history of the *Drosophila*** 3       ***buzzatii* cluster (*repleta* group)** 4

5   Nicolás N. Moreyra<sup>1,2\*</sup>, Julián Mensch<sup>1,2</sup>, Juan Hurtado<sup>1,2</sup>, Francisca Almeida<sup>1,2</sup>, Cecilia Laprida<sup>1,3</sup>,  
6   Esteban Hasson<sup>1,2\*</sup>

7

8   <sup>1</sup> Departamento de Ecología, Genética y Evolución, Facultad de Ciencias Exactas y Naturales,  
9   Universidad de Buenos Aires, Ciudad Autónoma de Buenos Aires, Argentina;

10  <sup>2</sup> Instituto de Ecología, Genética y Evolución de Buenos Aires, Consejo Nacional de Investigaciones  
11  Científicas y Técnicas, Ciudad Autónoma de Buenos Aires, Argentina;

12  <sup>3</sup> Instituto de Estudios Andinos, CONICET/UBA, Ciudad Autónoma de Buenos Aires, Argentina.

13

14  \* Corresponding author

15  E-mails: [nmoreyra@ege.fcen.uba.ar](mailto:nmoreyra@ege.fcen.uba.ar) (NNM); [ehasson@ege.fcen.uba.ar](mailto:ehasson@ege.fcen.uba.ar) (EH)

16

## 17   **Abstract**

18       The *Drosophila repleta* group is an array of more than 100 cactophilic species endemic to the  
19   “New World”. The acquisition of the ability to utilize decaying cactus tissues as breeding and  
20   feeding sites is a key aspect that allowed the successful diversification of the *repleta* group in the  
21   American deserts. Within this group, the *Drosophila buzzatii* cluster is a South American clade of  
22   seven cactophilic closely related species in different stages of divergence, a feature that makes it a

23 valuable model system for evolutionary research. However, even though substantial effort has been  
24 devoted to elucidating the phylogenetic relationships among members of the *D. buzzatii* cluster, the  
25 issue is still controversial. In effect, molecular phylogenetic studies performed to date generated  
26 ambiguous results since tree topologies depend on the kind of molecular marker employed.  
27 Curiously, even though mitochondrial DNA has become a popular marker in evolutionary biology  
28 and population genetics, none of the more than twenty *Drosophila* mitogenomes assembled so far  
29 belongs to this cluster. In this work we report the assembly of six complete mitogenomes of five  
30 species: *D. antonietae*, *D. borborema*, *D. buzzatii*, *D. seriema* and two strains of *D. koepferae*, with  
31 the aim to revisit the phylogenetic relationships and divergence times by means of a mitogenomic  
32 approach. The recovered topology using complete mitogenomes gives support to the hypothesis of  
33 the monophyly of that the *D. buzzatii* cluster and shows two main clades, one including *D. buzzatii*  
34 and *D. koepferae* (both strains) and the other the remaining species. These results are in agreement  
35 with previous reports based on a few mitochondrial and/or nuclear genes but in conflict with the  
36 results of a recent large-scale nuclear phylogeny, suggesting that nuclear and mitochondrial  
37 genomes depict different evolutionary histories.

## 38 **Introduction**

39 Nowadays, almost every mitochondrial genome, called mitogenome, can be assembled  
40 directly from genome or even transcriptome sequencing datasets [1, 2]. The exponential  
41 development of next-generation sequencing (NGS) technologies, together with efficient  
42 bioinformatic tools for the analysis of genomic information make possible the fast and cheap  
43 assembly of mitochondrial genomes, giving rise to the emergence of the mitogenomics era [3].  
44 Mitogenomics has been very useful in illuminating phylogenetic relationships at various depths of  
45 the Tree of Life, e.g. among early branching of metazoan phyla [4], among crocodylians and their  
46 survival in the Cretaceous-Tertiary boundary [5], Primates [6], the largest clade of freshwater  
47 actynopterigian fishes [7] and Anura, the largest living Amphibian group [8]. Also, mitogenomic

48 approaches have been used to investigate evolutionary relationships in groups of closely related  
49 species (e.g. [9]). In animals, the mitochondrial genome has been a popular choice in phylogenetic  
50 and phylogeographic studies because of its mode of inheritance, rapid evolution and the fact that it  
51 does not recombine [10]. Such physical linkage implies that all regions of mitogenomes are  
52 expected to produce the same phylogeny. However, the use of different regions of the mitochondrial  
53 genome or even the complete mitogenome may lead to incongruent results [11], suggesting that  
54 mitogenomics sometimes may not reflect the true species history but rather the mitochondrial  
55 history [12-16]. Inconsistencies across markers may result from inaccurate reconstructions or from  
56 actual differences between genes and species trees. In fact, most methods do not take into  
57 consideration that different genomic regions may have different evolutionary histories, mainly due  
58 to the occurrence of incomplete lineage sorting and introgressive hybridization [17-19].

59         Since the last century, the *Drosophila* genus has been extensively studied because of the  
60 well-known advantages that several species offer as experimental models. A remarkable feature of  
61 this genus, that comprises more than two thousand species [20], is its diverse ecology: some species  
62 utilize fruits as breeding sites, others flowers, tree sap fluxes and cacti (reviewed in [21-24]). The  
63 adoption of decaying cacti as breeding sites occurred more than once in the evolutionary history of  
64 *Drosophilidae* [25, 26] and is considered a key innovation in the diversification and the invasion of  
65 American deserts by species of the *Drosophila repleta* group (*repleta* group from hereafter) [25].  
66 Most species of this group are capable of developing in necrotic cactus tissues while feeding upon  
67 cactophilic yeasts associated to the decaying process [27-34].

68         The *repleta* group comprises more than one hundred species [22, 35-38], however, only one  
69 of the more than twenty complete (or nearly complete) *Drosophila* mitogenomes assembled so far  
70 belongs to a species of this group (checked in GenBank, March 28, 2019), *Drosophila mojavensis*  
71 (GenBank: BK006339.1). The latter, the first cactophilic fly to have a sequenced nuclear genome  
72 [39], is a member of the *D. mullerii* complex, an assemblage of species that belongs to the *D.*

73 *mulleri* subgroup, one of the six species subgroups of the *repleta* group [36].

74 The *D. buzzatii* complex is the sister group of the *D. mulleri* complex [25]. It diversified in  
75 the Caribbean islands and South America, giving rise to the *D. buzzatii* (*buzzatii* cluster from  
76 hereafter), *D. martensis* and *D. stalker* clusters [40]. The former is an ensemble of seven closely  
77 related species, *D. antonietae* [41], *D. borborema* [42], *D. buzzatii* [43], *D. gouveai* [41], *D.*  
78 *koepferae* [44], *D. serido* [42], and *D. seriema* [45]. All species are endemic to South America (Fig  
79 1), except the semi-cosmopolitan *D. buzzatii* that reached a wide distribution following human  
80 mediated dispersion of prickly pears of the genus *Opuntia* (Caryophyllales, Cactaceae) in historical  
81 times [34, 46, 47]. These species inhabit open areas of sub-Amazonian semidesertic and desertic  
82 regions of South America, where flies use necrotic cactus tissues as obligatory feeding and breeding  
83 resources [34, 48]. Regarding host plant utilization, *D. buzzatii* is an *Opuntia* specialist [30], a  
84 condition considered as ancestral [25]. However, *D. buzzatii* has also been recovered from necrotic  
85 columnar cacti [34]. The remaining species are mainly columnar dwellers though *D. antonietae*, *D.*  
86 *serido* and *D. koepferae* can also emerge marginally from rotting prickly pears [48].

87 **Fig 1. Geographical distribution of *buzzatii* cluster species. Modified from [49].**

88 Species of the *buzzatii* cluster are almost indistinguishable by external morphology, however,  
89 differences in the morphology of male intromittent organ (aedeagus) and polytene chromosomes  
90 banding patterns provide clues to species identification (reviewed in [34, 47, 50]). The cluster has  
91 been divided into two groups based on aedeagus morphology, the first includes *D. buzzatii* and the  
92 remaining species compose the so-called *Drosophila serido* sibling set -*serido* sibling set from  
93 hereafter- [47]. In turn, the analysis of polytene chromosomes revealed four informative paracentric  
94 inversions that define four main lineages: inversion 5g fixed in *D. buzzatii*, 2j<sup>9</sup> in *D. koepferae*, 2x<sup>7</sup>  
95 shared by *D. antonietae* and *D. serido*, and 2e<sup>8</sup> shared by *D. borborema*, *D. gouveai*, and *D.*  
96 *seriema* [40, 51]. However, neither genital morphology nor chromosomal inversions are useful to  
97 discern the basal relationships within the cluster.

98 Pre-genomic phylogenetic studies based on a few molecular markers generated debate since  
99 different tree topologies were recovered depending on the molecular marker used. On one hand, the  
100 mitochondrial *cytochrome oxidase I (COI)* and the *X-linked period* give support to the hypothesis of  
101 two main clades, one integrated by *D. buzzatii* and *D. koepferae* and another comprising the  
102 remaining species [47, 52, 53]. On the other hand, trees based on a few nuclear and mitochondrial  
103 markers support the hypothesis that *D. koepferae* is part of the *serido* sibling set [25, 54]. Moreover,  
104 a recent genomic level study using a large transcriptomic dataset supports the placement of *D.*  
105 *koepferae* as part of the *serido* sibling set and *D. buzzatii* as sister to this set [49]. However,  
106 phylogenetic relationships within the *serido* sibling set could not be ascertained despite the  
107 magnitude of the dataset employed by Hurtado and co-workers (2019). Thus, our aim is to shed  
108 light on the evolutionary relationships within the *buzzatii* by means of a mitogenomic approach.

109 In this paper, we report the assembly of the complete mitogenomes of *D. antonietae*, *D.*  
110 *borborema*, *D. buzzatii*, *D. seriema* and two strains of *D. koepferae*, together with the  
111 corresponding gene annotations. Here we also present a mitogenomic analysis that defines a  
112 different picture of the relationships within the *buzzatii* cluster with respect to the results generated  
113 with nuclear genomic data. Finally, we discuss possible causes of the discordance between nuclear  
114 and mitochondrial datasets.

## 115 **Material and Methods**

### 116 **Species selection**

117 The mitochondrial genomes of six isofemale lines of five species of the *buzzatii* cluster, for  
118 which NGS data are available, were assembled for the present study: *D. borborema* (obtained from  
119 Stock Center, derives from collections in Morro do Chapéu - Bahía State, Brazil), *D. antonietae*  
120 (collected in Martín García Island, Argentina), *D. buzzatii* (derives from collections in Spain by A.  
121 Ruiz); *D. seriema* (derived from collections in Serra do Cipó, Bahía State, Brazil) and two *D.*

122 *koepferae* strains (*D. koepferae11* derives from collections in Bolivia by A. Fontdevila and A. Ruiz,  
123 and *D. koepferae7.1* collected in Vipos, Tucumán, Argentina by J. Hurtado and E. Hasson). The  
124 rationale of including these *D. koepferae* strains is motivated by previous protein electrophoresis  
125 work showing a certain degree of genetic divergence between Bolivian and Argentinian populations  
126 higher than between conspecific populations in other species [44]. In addition, we also included  
127 four species of the subgenus *Drosophila*, for which assembled mitogenomes are available, as  
128 outgroups in the phylogenetic analyses: *D. grimshawi* (GenBank: BK006341.1), *D. littoralis*  
129 (GenBank: NC\_011596.1), *D. virilis* (GenBank: BK006340.1) and *D. mojavensis* (GenBank:  
130 BK006339.1).

### 131 **In silico mtDNA reads extraction**

132 Whole genome sequencing (WGS) and RNA-seq data for *D. antonietae*, *D. borborema* and  
133 both strains of *D. koepferae* were generated in our laboratory ([33, 49], Moreyra & Hasson  
134 unpublished data), except for *D. seriema* and *D. buzzatii* for which mitochondrial reads were  
135 retrieved from the Genome sequencing of *D. seriema* deposited in Sequence Read Archive database  
136 (SRA accession ID: ERX2037878) [55] and the *D. buzzatii* genome project (<https://dbuz.uab.cat>),  
137 respectively. For each species mitochondrial reads were extracted from genomic and transcriptomic  
138 (when available) datasets. Bowtie2 version 2.2.6 [56] was first used with parameters by defaults  
139 (end-to-end sensitive mode) to map reads to the mitochondrial genome of *D. mojavensis*, the closest  
140 relative of *buzzatii* cluster species available, as reference. Next, only reads that correctly mapped to  
141 the reference genome were retained using Samtools version 1.8 [57]. Finally, mapped reads from  
142 genomic and transcriptomic datasets were combined to generate a set of only mitochondrial reads.

### 143 **Mitochondrial reference genome assembly**

144 It is well known that at least 25% of NGS reads are of mitochondrial origin [3]. Therefore,  
145 after the mapping process it is possible to attain a coverage ranging from 2000x to more than

146 20000x for mitogenomes. In order to avoid miss-assemblies caused by the large number of reads,  
147 several coverage datasets were generated by random sampling. Then, a two-step assembly  
148 procedure was adopted for each coverage dataset based on recommendations of MITObim package  
149 version 1.8 [1]. In the first step, MIRA assembler [58] was run using the mitogenome of *D.*  
150 *mojavensis* as reference to build a new template from conserved regions. In the second step, the  
151 MITObim script was applied to the new template to reconstruct the entire mitochondrial genome by  
152 mapping the corresponding reads running a maximum of ten mapping iterations. All the different  
153 coverage assemblies were aligned with Clustalw2 version 2.1 [59] and, then, a consensus assembly  
154 was generated considering a sequence representation threshold of 60% not allowing gaps. This  
155 pipeline was employed for the assembly of the mitogenomes of all strains.

## 156 **PCR amplification, Sanger sequencing and consensus**

### 157 **correction**

158 Mitogenomes assembly coverage averaged more than 20000x, however, three regions  
159 including parts of *COI*, *NADH dehydrogenase subunit 6 (ND6)* and *large ribosomal RNA (rRNAL)*  
160 genes, presented low read representation in all species, producing miss-assemblies and  
161 fragmentation. These regions were PCR-amplified with GO taq Colorless Master Mix by Promega  
162 using primers designed for regions conserved across the six mitogenomes assembled in this study  
163 (data in S1 Text). PCR amplifications included an initial denaturation at 94°C for 90 s, followed by  
164 25 cycles of denaturation at 94°C for 45 s, annealing at 62°C for 50 s, extension at 72°C for 1 min  
165 and a final 4 min extension. PCR fragments were sequenced in both directions on an ABI-3130xl  
166 (Genetic Analyzer). Sequences were analyzed and filtered using Mega X software [60] and, finally,  
167 merged with the assemblies.

## 168 **Genome annotation and bioinformatic analyses**

169 The six new assemblies were annotated in the MITOS web server (<http://mitos.bioinf.uni->

170 leipzig.de) [61], using the invertebrate mitochondrial genetic code and default parameter settings.  
171 The position and orientation of annotations were examined by mapping reads to mitogenomes with  
172 Bowtie2 [56] and visualization conducted with IGV version 2.4.10 [62]. In addition, nucleotide  
173 composition and codon usage were analyzed using MEGA version 10 [60]. A homemade python  
174 package (available upon request) was developed to compute estimates of pairwise nucleotide  
175 divergence ( $\pi$ ) between *buzzatii* cluster species, and to visualize variation of  $\pi$  along the  
176 mitogenomic alignment of the cluster. Similar estimates were included for the *D. melanogaster*  
177 subgroup, a well-studied group of species, to compare divergence patterns along the mitochondrial  
178 DNA with the *buzzatii* cluster. To this end, mitogenomes of *D. melanogaster* (KJ947872.2), *D.*  
179 *erecta* (BK006335.1), *D. simulans* (NC\_005781), *D. sechellia* (NC\_005780) and *D. yakuba*  
180 (NC\_001322.1) were aligned, and  $\pi$  estimates were obtained as described above. Synonymous ( $d_S$ )  
181 and non-synonymous substitution rates ( $d_N$ ) were also estimated for each mitochondrial protein  
182 coding gene (PCG) using PAML 4.8 [63]. These estimates, as well as, the  $\omega$  ratio ( $d_N/d_S$ ) were  
183 obtained separately for both the *buzzatii* cluster and the *melanogaster* subgroup sequence  
184 alignments. Multiple sequence alignments of each coding gene were obtained with Clustalw2  
185 version 2.1 [59].

## 186 **Phylogenetic analyses**

187 Phylogenetic analyses were conducted considering PCGs, ribosomal genes (rRNAs), transfer  
188 RNA genes (tRNAs) and intergenic regions (excluding the control region) of the 6 mitogenomes  
189 plus the sequences of the outgroups *D. virilis*, *D. grimshawi*, *D. litoralis* and *D. mojavensis* (see  
190 details in species selection section). The alignment of the ten mitogenomes was performed with  
191 Clustalw2 version 2.1 [59]. The flanking sequences that correspond to the control region and  
192 portions of the alignment presenting abundant gaps were manually removed with Seaview version 4  
193 [64]. The final alignment was used as input in PartitionFinder2 [65] to determine the best partition  
194 scheme and substitution models, considering separate loci and codon position (in PCGs), which



195 were used in Bayesian Inference and Maximum Likelihood phylogenetic searches. In the Bayesian  
196 Inference approach, executed with MrBayes version 3.2.2 [66], both substitution model and  
197 parameter estimates were unlinked. Then, two independent Markov Chain Monte Carlo (MCMC)  
198 were run for 30 million generations with three samplings every 1000 generations, giving a total of  
199 30,000 trees. Tracer version 1.7.1 [67] was used to assess the convergence of the chains mixing,  
200 where all parameters had ESS>200 (effective sample sizes), 25% of the trees were discarded as  
201 burn-in and the remaining trees were used to estimate a consensus tree and the posterior probability  
202 of each clade. The consensus tree was plotted and visualized with FigTree version 1.4.4  
203 (<https://github.com/rambaut/figtree/releases>) [68]. Maximum Likelihood searches were performed  
204 in 2,000 independent runs using RAxML version 8.2.11 [69], applying the rapid hill climb  
205 algorithm and the GTR+GAMMA model, considering the partition scheme obtained with  
206 PartitionFinder2. Two thousand bootstrap replicates were run to obtain clade frequencies that were  
207 plotted onto the tree with highest likelihood. Tree and bootstrap values were visualized with Figtree  
208 version 1.4.4 [68]. Bayesian Inference searches for each PCG were individually done to seek for  
209 correlations with the topology recovered using the complete mitogenome. The GTR-GAMMA  
210 model, together with the same parameters and evaluation detailed before were applied on each  
211 MCMC.

## 212 **Divergence time estimation**

213 Divergence times were estimated using the same methodology as in Hurtado et al., (2019).  
214 Four-fold degenerate third codon sites (putative neutral sites) of PCGs were extracted from the  
215 alignment and Bayesian Inference searches were run using BEAST version 1.10.4 [70]. A strict  
216 clock was set using a prior for the mutation rate of  $6.2 \times 10^{-07}$  per year (standard deviation of  
217  $1.89 \times 10^{-07}$ ), as was empirically estimated for mitochondrial DNA in *Drosophila melanogaster* [71].  
218 In addition, a birth-death process with incomplete sampling and a time of 11.3 myr (confidence  
219 interval ranging from  $\sim 9.34$  to  $\sim 13$ ) [25] to the root were defined as tree priors. Two MCMC were

220 done in 30 million generations with tree sampling every 1000 generations. Tracer [67] was used to  
221 evaluate the convergence of the chains, discarding 10% of the total trees (burn-in). The information  
222 of the recovered trees was summarized in one tree applying LogCombiner and TreeAnnotator  
223 version 1.10.4 (available as part of the BEAST package), including the posterior probabilities of the  
224 branches, the age of the nodes, and the posterior estimates and HPD limits of the node heights. The  
225 target tree was visualized using FigTree [68]. Only *D. mojavensis* was included as outgroup in this  
226 analysis to minimize problems of among-taxa rate variation given by the large divergence between  
227 the *buzzatii* cluster and the rest of the species already sequenced, together with the lack of time  
228 point calibrations and accurate mutation rates.

## 229 **Results**

### 230 **Mitogenomes characterization, nucleotide composition and** 231 **codon usage**

232 The length of the assembled mitogenomes varied from 14885 to 14899bp among the six  
233 strains reported in this paper. Mitogenomes consisted of a conserved set of 37 genes, including 13  
234 PCGs, 22 tRNAs and 2 rRNAs genes, with order and orientation identical to *D. mojavensis*. Several  
235 short non-coding intergenic regions were also found. Twenty-three genes were found on the heavy  
236 strand (+) and fourteen on the light strand (-). Detailed statistics about metrics and composition of  
237 the mitogenomes are shown in Table 1.

238 **Table 1. Composition of mitochondrial elements in the species assemblies of the *Drosophila***  
239 ***buzzatii* cluster.**

|                       | Species assembly     |                     |                    |                       |                        |                   |
|-----------------------|----------------------|---------------------|--------------------|-----------------------|------------------------|-------------------|
| Statistics            | <i>D. antonietae</i> | <i>D. borborema</i> | <i>D. buzzatii</i> | <i>D. koepferae11</i> | <i>D. koepferae7.1</i> | <i>D. seriema</i> |
| <b>Total length</b>   | 14885                | 14889               | 14889              | 14892                 | 14891                  | 14891             |
| <b>GC (%)</b>         | 23.36                | 23.22               | 23.60              | 23.20                 | 23.20                  | 23.26             |
| <b>N's (%)</b>        | 0.00                 | 0.00                | 0.00               | 0.00                  | 0.00                   | 0.00              |
| <b>Intergenic (%)</b> | 2.76                 | 2.71                | 2.64               | 2.80                  | 2.77                   | 2.90              |
| <b>tRNAs (%)</b>      | 9.82                 | 9.81                | 9.80               | 9.81                  | 9.81                   | 9.80              |
| <b>PCGs (%)</b>       | 72.98                | 73.04               | 73.15              | 72.95                 | 72.97                  | 72.85             |
| <b>rRNAs (%)</b>      | 14.44                | 14.45               | 14.41              | 14.44                 | 14.44                  | 14.44             |

240 Overall nucleotide composition in PCGs ranged between 37.6-37.8% A, 37.2-37.9% T, 10.2-  
 241 10.4% G, and 14.1-14.7% C. The thirteen PCGs were AT-biased as in the entire mitogenome, and  
 242 the codon usage bias in each gene was greater than 0.50. The most frequently used codons were  
 243 UUA (Leu), AUU (Ile), and UUU (Phe) in all cases. Codon usage information for each species is  
 244 shown in Table in S1 Table.

## 245 Genetic diversity among mitogenomes

246 Pairwise nucleotide diversity ( $\pi$ ) estimates for both the *buzzatii* cluster and the *D.*  
 247 *melanogaster* subgroup are shown in Fig 2. Though  $\pi$  values along the mitochondrial genome  
 248 alignment were, on average, larger in the *melanogaster* subgroup than in the *buzzatii* cluster, pattern  
 249 of variation of  $\pi$  along the entire molecules were very similar. Large and small ribosomal subunits  
 250 (rRNAs) exhibited lower divergence values than the remaining mitochondrial genes in both groups.  
 251 A substantial difference was found in the region encompassing *COIII*, *tRNA-G* and *ND3* genes. At  
 252 these positions, from 5000 to 6000, nucleotide diversity was the highest in the *melanogaster*  
 253 subgroup, showing an apparent increase represented by two high peaks absent in the *buzzatii* cluster.  
 254 Considering genetic divergence within the *buzzatii* cluster (Fig 3), the lowest value of average

255 pairwise nucleotide divergence was observed for the pair *D. borborema* and *D. seriema* ( $\pi =$   
 256  $1.91 \times 10^{-03}$ ), while between *D. seriema* and *D. buzzatii* divergence was an order of magnitude larger  
 257 ( $\pi = 2.73 \times 10^{-02}$ ). Divergence between *D. koepferae* strains was surprisingly high ( $7.14 \times 10^{-03}$ ). The  
 258 complete set of divergence estimates in the *buzzatii* cluster is reported in Table in S2 Table.  
 259 Substitution rates in synonymous and non-synonymous sites are listed in Table 2. The ratio  $d_N/d_S$  ( $\omega$ )  
 260 varied from 0.003 to 0.060 among PCGs in the *buzzatii* cluster. The range in the *melanogaster*  
 261 subgroup was similar, but with a lower upper bound (0.003 - 0.018). Two loci appear as outliers in  
 262 the *buzzatii* cluster (*ATP8* and *ND2*), which apart from these two loci, has lower divergence values  
 263 than in the *melanogaster* subgroup. In any case, the results suggest that purifying selection imposes  
 264 strong constraints in the evolution of mitochondrial genes. Nonsynonymous ( $d_N$ ), synonymous ( $d_S$ )  
 265 and the  $\omega$  ratios varied among PCGs (Table 2).

266 **Fig 2. Nucleotide diversity ( $\pi$ ) variation along the mitogenome, estimated for a sliding window**  
 267 **of 500bp with an overlap of 100bp.**  $\pi$  values for species belonging the *buzzatii* cluster and the  
 268 *melanogaster* subgroup are represented independently.

269 **Fig 3. Pairwise comparison of nucleotide diversity between species belonging the *buzzatii***  
 270 **cluster.**

271 **Table 2. Estimates of non-synonymous ( $d_N$ ) and synonymous ( $d_S$ ) substitutions and their ratio**  
 272 **( $\omega$ ) among species of the *buzzatii* cluster and the *melanogaster* subgroup.**

| PCG          | <i>buzzatii</i> cluster |       |       | <i>melanogaster</i> subgroup |       |       |
|--------------|-------------------------|-------|-------|------------------------------|-------|-------|
|              | $\omega$                | $d_S$ | $d_N$ | $\omega$                     | $d_S$ | $d_N$ |
| <i>ATP6</i>  | 0.005                   | 1.390 | 0.007 | 0.014                        | 2.364 | 0.034 |
| <i>ATP8</i>  | 0.060                   | 0.506 | 0.031 | 0.014                        | 4.892 | 0.071 |
| <i>CytB</i>  | 0.005                   | 1.463 | 0.008 | 0.010                        | 2.556 | 0.027 |
| <i>COI</i>   | 0.003                   | 1.211 | 0.003 | 0.003                        | 2.383 | 0.006 |
| <i>COII</i>  | 0.005                   | 1.058 | 0.005 | 0.008                        | 2.295 | 0.018 |
| <i>COIII</i> | 0.006                   | 1.277 | 0.008 | 0.012                        | 1.975 | 0.024 |
| <i>ND1</i>   | 0.003                   | 4.332 | 0.012 | 0.006                        | 4.490 | 0.028 |
| <i>ND2</i>   | 0.036                   | 1.102 | 0.040 | 0.016                        | 2.368 | 0.039 |

|             |       |       |       |       |       |       |
|-------------|-------|-------|-------|-------|-------|-------|
| <b>ND3</b>  | 0.009 | 3.657 | 0.034 | 0.016 | 3.085 | 0.051 |
| <b>ND4I</b> | 0.008 | 1.158 | 0.009 | 0.001 | 8.026 | 0.013 |
| <b>ND4</b>  | 0.011 | 1.253 | 0.013 | 0.009 | 4.306 | 0.040 |
| <b>ND5</b>  | 0.007 | 2.564 | 0.018 | 0.013 | 4.764 | 0.063 |
| <b>ND6</b>  | 0.012 | 2.231 | 0.027 | 0.018 | 4.534 | 0.082 |

## 273 **Phylogenetics analyses**

274 The sequences of the 13 PCGs, 22 tRNAs genes, 2 rRNAs genes, and intergenic regions were  
275 included in the alignment. Total length of the final matrix encompassing the ten mitogenomes was  
276 15044 characters, from which 1950 were informative sites, 11583 conserved, and 1422 were  
277 singletons. Both Maximum Likelihood and Bayesian Inference phylogenetic analyses recovered the  
278 same highly supported topology that confirms the monophyly of the *buzzatii* cluster (Fig 4). Two  
279 main clades can be observed in the tree, one including both *D. koepferae* strains as sister to *D.*  
280 *buzzatii*, and the second, comprising *D. antonietae* as sister species of the sub-clade formed by *D.*  
281 *borborema* and *D. seriema*. The species selected as outgroups were allocated as expected, with *D.*  
282 *mojavensis* as the closest relative of the *buzzatii* cluster. We also performed a gene tree analysis  
283 using all PCGs (S1 Fig). We could only obtained trees for 7 genes out of the thirteen PCGs, given  
284 the lack of informative sites in the alignments of *ATP8*, *ATP6*, *ND3*, *ND4I*, *COII* and *COIII*. Only  
285 two (*ND1* and *ND5*) out of the seven recovered gene trees that showed the same topology as the  
286 complete mitogenome, while the remaining genes produced three (different) topologies. Trees  
287 obtained with *CytB* and *ND4* allocated *D. buzzatii* as sister of the *serido* sibling set which included  
288 *D. koepferae*. *COI* and *ND2* retrieved trees where *D. buzzatii* and *D. koepferae* exchanged positions  
289 in the tree, placing *D. koepferae* as the species closest to the putative ancestor of the cluster. *ND6*  
290 recovered two clades where *D. antonietae* was the sister of *D. buzzatii* and *D. koepferae* (both  
291 strains) in one clade, and the pair *D. borborema*-*D. seriema* composed the other.

292 **Fig 4. Phylogenetics hypotheses for the *buzzatii* cluster based on the entire sequence of the**  
293 **mitogenome (control region not included).** Tree topology recovered by both Maximum  
294 Likelihood and Bayesian Inference searches. On each node is represented the bootstrap and the

295 posterior probability, respectively.

## 296 Divergence Times

297 PCGs contained 1201 4-fold degenerate sites in the mitogenomes of the *buzzatii* cluster  
298 strains assembled in this study. The tree obtained in the divergence time estimation analysis (Fig 5)  
299 was topologically identical to the trees obtained in the phylogenetic analyses using complete  
300 mitogenomes (see Fig 4). Divergence time estimations showed that the *buzzatii* cluster diverged in  
301 the Early Pleistocene, 2.11 Myr ago, and the split with the *D. mojavensis* common ancestor  
302 occurred 10.63 Myr ago in the Miocene. Our results also indicated that the clade containing *D.*  
303 *antonietae*, *D. borborema* and *D. seriema*, is younger than the clade composed by *D. buzzatii* and *D.*  
304 *koepferae*. In addition, the split between *D. borborema* and *D. seriema* is quite recent, about  
305 ~50000 years ago, in the Late Pleistocene, even more recent than the split of *D. koepferae* strains  
306 that diverged ~310000 years ago, in the Middle Pleistocene.

307 **Fig 5. Divergence times for the *buzzatii* cluster drawn on a Bayesian Inference tree.** Numbers  
308 on each node are the time estimates. Blue bars represent the 95% confidence intervals of estimates.

## 309 Discussion

310 In this paper, we report six newly assembled mitochondrial genomes of five cactophilic  
311 species of the *buzzatii* cluster. Our aim is to revisit the phylogenetic relationships by means of a  
312 mitogenomic approach in this set of closely related species in active cladogenesis.

313 Structural analyses showed that the newly assembled mitogenomes share molecular features  
314 with animal mitochondrial genomes sequenced so far [72]. All assembled mitogenomes contain the  
315 same set of genes usually found in animal mitochondrial genomes. Gene order and orientation, as  
316 well as the distribution of genes on the heavy and light strands are identical to the mitogenome of  
317 the closest relative *D. mojavensis* and other drosophilids [9]. Analysis of overall nucleotide  
318 composition of mitogenomes and PGCs revealed the typical AT-bias found in *Drosophila*

319 mitogenomes. Codon usage is highly biased suggesting that synonymous sites cannot be considered  
320 strictly neutral and that some sort of natural selection for translational accuracy governs codon  
321 usage [73].

322 Phylogenetic analyses based either on complete mitogenomes or four-fold degenerate sites  
323 (for divergence time estimations), retrieved a high-confidence tree, suggesting that the cluster is  
324 composed by two main clades, one including *D. buzzatii* and *D. koepferae* (both strains) and  
325 another comprising *D. antonietae*, *D. seriema* and *D. borborema*. These results are consistent with  
326 previous work based on single mitochondrial genes [52, 74], but inconsistent with phylogenetic  
327 studies based on both a small set of nuclear and mitochondrial genes [25] and a large set of nuclear  
328 genes -see below- [49]. Interestingly, the topology showing these two clades was only recovered in  
329 two (*ND1* and *ND5*) out of seven trees based on individual PCGs, whereas the remaining trees  
330 produced either a novel topology or a topology consistent with the phylogeny reported in Hurtado et  
331 al., (2019).

332 The lack of recombination causes mitochondrial DNA to be inherited as a unit, thus, trees  
333 obtained with individual mitochondrial genes are expected to share the same topology and to be  
334 consistent with the trees obtained with complete mitogenomes. Thus, our results suggest that using  
335 individual genes not only produce different topologies but also a poor resolution of phylogenetic  
336 relationships. Such inconsistencies between complete mitogenomes and gene trees in phylogenetic  
337 estimation may result from inaccurate reconstruction or from real differences among gene trees. The  
338 first possible explanation is the simple fact that numbers of informative sites within a single locus  
339 are not enough to accurately estimate phylogenetic relationships, particularly in groups of recently  
340 diverged species (overall support for gene trees was poorer than for the tree based on complete  
341 mitogenomes). Secondly, heterogeneity in evolutionary rates among genes and/or differences in  
342 selective constraints along the mitogenome can also account for the inconsistencies [75-77]. As a  
343 matter of fact, we detected substantial variation of synonymous and nonsynonymous rates as well as

344 of the  $\omega$  ratio across PCGs. In addition, variation among oxidative phosphorylation complexes in  
345 the *buzzatii* cluster was high. The *ND* complex was, on average, less constrained than the *ATP*  
346 complex, *cytochrome b* (*CytB*) and *cytochrome oxidase* complex (*COI*, *COII* & *COIII*), consistent  
347 with results reported in the *melanogaster* subgroup [9, 78]. Another factor that may lead to biased  
348 tree construction, particularly relevant for mitochondrial genes characterized by high substitution  
349 rates, is substitutional saturation [79]. A priori, saturation should not be problematic in recently  
350 diverged species, like the *buzzatii* cluster, however, saturation may be problematic in the estimation  
351 of divergence relative to the outgroup and, thus, for phylogenetic inference. The closest outgroup to  
352 the *buzzatii* cluster employed in our study is the *mulleri* complex species *D. mojavensis*. Available  
353 evidence suggest that these complexes diverged ~10 MYA (but see a more recent estimate by  
354 Hurtado et al -2019- of 5.5Myr) suggesting that substitution saturation may lead to inaccurate  
355 phylogenetic reconstruction.

356 In this context, a recent report investigating the effect of using individual genes, subsets of  
357 genes, complete mitogenomes and different partitioning schemes on tree topology suggested a  
358 framework to interpret the results of mitogenomic phylogenetic studies [11]. The authors concluded  
359 that trees obtained with complete mitogenomes reach the highest phylogenetic performance and  
360 reliability than single genes or subsets of genes. Therefore, we consider that phylogenetic  
361 relationships inferred from complete mitogenomes reflect the evolutionary history of, at least,  
362 mitogenomes.

363 The phylogenetic relationships depicted by our mitogenomic approach are incongruent with a  
364 recent study based on transcriptomic data [49]. Based on a concatenated matrix of 813 kb  
365 uncovering 761 gene regions, the authors obtained a well-supported topology in which *D. koepferae*  
366 appears phylogenetically closer to *D. antonietae* and *D. borborema* than to *D. buzzatii*, placing *D.*  
367 *buzzatii* alone as sister to the rest of the cluster. This topology is in agreement with male genital  
368 morphology, cytological and molecular phylogenetic evidence [25, 34, 54]. Nevertheless, the



369 pattern of cladogenesis of the trio *D. koepferae*-*D. borborema*-*D. antonietae* could not be fully  
370 elucidated since a nuclear gene tree analysis yielded ambiguous results. As a matter of fact, the  
371 analysis of the 761 gene trees reported showed that about one third of the genes supported each one  
372 of the three possible topologies for the trio *D. koepferae*-*D. antonietae*-*D. borborema* indicating a  
373 hard polytomy [49]. In contrast, the early separation of *D. buzzatii* from the *serido* sibling set is  
374 supported by 97% of the genes and, surprisingly, none of the gene trees recovered the clade  
375 including *D. buzzatii* and *D. koepferae* as the sister group of the clade involving *D. antonietae* and  
376 *D. borborema* (J. Hurtado, F. Cunha-Almeida, E. Hasson, unpublished results) as suggested by the  
377 present mitogenomic approach.

378         Such mitonuclear discordance, has been reported in several animal species. A recent review  
379 lists several examples in animals [80]. Likewise, the literature in this respect is abundant in the  
380 genus *Drosophila*. Well-known cases are *D. pseudoobscura* and *D. persimilis* [81]; *D. santomea*  
381 and *D. yakuba* [82]; and *D. simulans* and *D. mauritiana* [83]. Mitonuclear discordance may be  
382 caused by incomplete lineage sorting (ILS) and/or introgressive hybridization. These two factors do  
383 not affect equally mitochondrial and nuclear genomes, ILS is more likely for nuclear genes,  
384 especially when the ancestral effective population size of recently diverged species was large [84,  
385 85], while introgressive hybridization is expected to be prevalent in mitochondrial genomes given  
386 its lower effective population size [86]. If we accept that the topology based on nuclear genes is  
387 representative of the species-history (see also [48]), the closer similarity between *D. buzzatii* and *D.*  
388 *koepferae* mitogenomes is suggestive of gene flow between these largely sympatric species [34].  
389 Thus, we suggest that *D. buzzatii* and *D. koepferae* lineages initially separated but then exchanged  
390 genes via fertile F1 females (males were likely sterile as expected by the ubiquitous Haldane rule)  
391 before finally separating less than 1.5 Myr ago. Not only the more recent mitogenomic ancestry is  
392 suggestive of gene exchange, also traces of introgressive hybridization can still be detected in  
393 nuclear genomes [49].

394 In fact, phylogenetic, population genetic and experimental hybridization studies suggest a  
395 significant role of introgression in the evolutionary history of the *buzzatii* cluster. Phylogeographic  
396 studies revealed discordances between mitochondrial markers and genital morphology in areas of  
397 sympatry between species [52]. Likewise, interspecific gene flow has been invoked to account for  
398 shared nucleotide polymorphisms in nuclear genes in *D. buzzatii* and *D. koepferae* that cannot be  
399 accounted by ILS [87, 88]. Moreover, experimental hybridization studies have shown that several  
400 species of the *buzzatii* cluster can be successfully crossed, producing fertile hybrid females that can  
401 be backcrossed to both parental species. Interestingly, *D. koepferae* can be crossed with *D.*  
402 *antonietae*, *D. borborema*, *D. buzzatii* and *D. serido* [44, 47, 89-93].

403 Our estimates of divergence time are in conflict with previous studies. In general, previous  
404 estimates, based on individual or a few genes (either mitochondrial or nuclear) suggested an older  
405 origin of the cluster and deeper splitting times within the cluster when compared to the estimates  
406 based on transcriptomes and mitogenomes. In effect, Gómez & Hasson (2003) and Oliveira et al.,  
407 (2012) dated the split of *D. buzzatii* from the remaining species of the cluster in ~4 or 4.6 Myr,  
408 respectively, whereas Manfrin et al.,'s (2001) estimates are even older, from 3 to 12 Myr for the  
409 most recent to the more ancient split. In contrast, putting apart the divergence time of the clade *D.*  
410 *buzzatii*-*D. koepferae* for the reasons discussed above, the radiation of the remaining three species  
411 seems to be extremely recent, less than 1 Myr ago (Fig 5) using mitochondrial genomes, which are  
412 similar to estimates based on transcriptomes [49]. However, it is worth mentioning that divergence  
413 times estimated in the present paper and by Hurtado et al. (2019), may be biased downwards since  
414 both are based on empirical mutation rates for nuclear and mitochondrial genes, respectively,  
415 calculated over 200 generations for *D. melanogaster* [71]. Thus, these results should be interpreted  
416 with caution in the light of evidence suggesting not only the time-dependence of molecular  
417 evolutionary rates but also that mutation rates obtained using pedigrees and laboratory mutation-  
418 accumulation lines, often exceed long-term substitution rates by an order of magnitude or more [77].

419 In this sense, an alternative method without a mutation rate prior, measured a rate four times lower  
420 that the reported in Haag-Liautard et al., (2008), consequently, yielding older divergence times  
421 (results not shown).

422 Even though divergence times estimates obtained in this study cannot be entirely compared to  
423 assessments based on nuclear genomic data and individual nuclear genes, given uncertainty of tree  
424 topology, they concur in the fact that species of the *buzzatii* cluster emerged during the Late  
425 Pleistocene in association with Quaternary climate fluctuations [48, 49, 74]. Moreover, in view of  
426 the obligate ecological association between *buzzatii* cluster species and cacti, the so-called  
427 Pleistocene “refuge hypothesis” is a suitable explanation for the diversification in this group in  
428 active cladogenesis. This hypothesis argues that Pleistocene glacial cycles successively generated  
429 isolated patches of similar habitats across which populations may have diverged into species [94,  
430 95].

431 Available paleo-climatic evidence, consistent with the Pleistocene “refuge hypothesis”, can  
432 also account for the relatively deep intraspecific divergence between Bolivian and Argentinian *D.*  
433 *koepferae* strains. In effect, because Quaternary topographical patterns in the Central Andes have  
434 remained unchanged in the last 2-3 Myr, a plausible explanation for this late Pleistocene vicariant  
435 event is related with glacial-interglacial cycles [96]. Although the validity of the Pleistocene “refuge  
436 hypothesis” is controversial (cf. [97]) and few studies addressed specific hypotheses on how the  
437 Quaternary glacial-interglacial cycles impacted species diversification [98], our divergence time  
438 estimates between Bolivian and Argentinian *D. koepferae* suggest a role of climatic oscillations as a  
439 factor of ecogeographical isolation in the Central Andes during the Pleistocene. Moreover, paleo-  
440 climatological evidence suggest that the area inhabited by *D. koepferae* has been exposed to  
441 substantial climatic variations on timescales of  $10^3$  to  $10^5$  years related with Glacial-interglacial  
442 cycles. Thus, Andean north-south exchanges may have been alternately favored or disfavored by  
443 these Quaternary climatic oscillations. In fact, the estimated age of the vicariant event between the

444 *D. koepferae* strains is tantalizingly coincident with the coldest phase of the Marine Isotopic Stage  
445 (MIS) 10, which corresponds to a glacial period that ended about 337,000 years ago [99]. The  
446 coldest period of the MIS 10 (recorded in global air and sea surface temperature and also the lowest  
447 atmospheric CO<sub>2</sub> levels) occurred at 355,000 years, well within the confidence interval of our  
448 divergence time estimated between *D. koepferae* strains. In a global scale, glacial periods are  
449 primarily reflected in a lowering of air temperature but also in altered patterns of precipitation in the  
450 both sides of the Central Andes [100] which were in turn the main drivers of vegetation changes  
451 [101] including the appearance of South American columnar cacti [102]. Besides the impact on air  
452 temperature, periods of ice advance in the Central Andes generally were periods of negative water  
453 balance in the Pacific coastal regions west to the Central Andes [103], and a positive water balance  
454 in the Central Andes, as evidenced by deeper and fresher conditions in Lake Titicaca [104] (see S2  
455 Fig). Thus, during the colder and wetter phases of the MIS 10 in the Central Andes, species  
456 distributions may have suffered a general contraction towards the southern and northern lowland  
457 warmer refugia between 1000-2000 m, whereas a general worsening condition occurred in higher  
458 western elevations. North and south refugia were probably separated by a gap of low suitability  
459 represented by the steep gradient of the eastern flank of Eastern Andes between 22-24°S, which  
460 represents today a region of strong W-E precipitation gradient. The MIS 10 glacial cycle has a  
461 particular structure since it does not have a pronounced interstadial (relative warmer) conditions in  
462 the mid-cycle [105], providing a prolonged, effective “soft” dispersal barrier that affected the  
463 distribution of *D. koepferae*.

464 Finally, our present study indicates the need of counting with the mitogenomes of the other  
465 Brazilian species *D. gouveai* and *D. serido* to achieve a deeper understanding of the evolutionary  
466 history of the cluster. A comparative analysis including the complete mitogenomes of all species  
467 may help to disentangle the intricate relationships in the *buzzatii* cluster.

## 468 **Acknowledgements**

469        Nicolás N. Moreyra is recipient of a PhD scholarship awarded by CONICET and ANPCyT.  
470 JM, JH, FA and EH are fellows of CONICET.

## 471 **References**

- 472        1.Hahn C, Bachmann L, Chevreur B. Reconstructing mitochondrial genomes directly from  
473        genomic next-generation sequencing reads - A baiting and iterative mapping approach.  
474        *Nucleic Acids Res.* 2013;41(13).
- 475        2.Tian Y,Smith DR. Recovering complete mitochondrial genome sequences from RNA-Seq: A  
476        case study of *Polytomella* non-photosynthetic green algae. *Mol Phylogenet Evol.* 2016;98,  
477        57-62.
- 478        3.Smith, DR. The past, present and future of mitochondrial genomics: Have we sequenced  
479        enough mtDNAs? *Brief Funct Genomics.* 2016;15(1), 47-54.
- 480        4.Osigus HJ, Eitel M, Bernt M, Donath A, Schierwater B. Mitogenomics at the base of  
481        Metazoa. *Mol Phylogenet Evol.* 2013;69, 339-351.
- 482        5.Roos J, Aggarwal RK, Janke A. Extended mitogenomic phylogenetic analyses yield new  
483        insight into crocodylian evolution and their survival of the Cretaceous-Tertiary boundary.  
484        *Mol Phylogenet Evol.* 2007;45, 663-673.
- 485        6.Finstermeier K, Zinner D, Brameier M, Meyer M, Kreuz E, Hofreiter M, et al. A  
486        Mitogenomic Phylogeny of Living Primates. *PLoS ONE.* 2013;8(7): e69504.
- 487        7.Saitoh K, Sado T, Mayden RL, Hanzawa N, Nakamura K, Nishida M, et al. Mitogenomic  
488        Evolution and Interrelationships of the Cypriniformes (Actinopterygii: Ostariophysi): The  
489        First Evidence Toward Resolution of Higher-Level Relationships of the World's Largest  
490        Freshwater Fish Clade Based on 59 Whole Mitogenome Sequences. *J Mol Evol.* 2006;63:  
491        826-841.

- 492 8.Zhang P, Liang D, Mao RL, Hillis DM, Wake DB, Cannatella DC. Efficient Sequencing of  
493 Anuran mtDNAs and a Mitogenomic Exploration of the Phylogeny and Evolution of Frogs.  
494 Mol Biol Evol. 2013;30(8): 1899-1915.
- 495 9.Montooth et al., 2009. Montooth, KL, Abt, DN, Hofmann, JW, Rand, DM. Comparative  
496 genomics of Drosophila mtDNA: novel features of conservation and change across functional  
497 domains and lineages. J Mol Evol. 2009; 69(1),94.
- 498 10.Cameron, SL. Insect Mitochondrial Genomics: Implications for Evolution and Phylogeny.  
499 Annu Rev Entomol. 2001;59(1), 95-117.
- 500 11.Duchêne S, Archer FI, Vilstrup J, Caballero S, Morin PA. Mitogenome Phylogenetics: The  
501 Impact of Using Single Regions and Partitioning Schemes on Topology, Substitution Rate  
502 and Divergence Time Estimation. PLoS ONE. 2011;6(11): e27138.
- 503 12.Rohland N, Malaspinas AS, Pollack JL, Slatkin M, Matheus P, Hofreiter M. Proboscidean  
504 mitogenomics: chronology and mastodon as outgroup. PLoS Biol. 2007;5: e207.
- 505 13.Willerslev E, Gilbert T, Binladen J, Ho SYW, Campos PF, Ratan A, et al. Analysis of  
506 complete mitochondrial genomes from extinct and extant rhinoceroses reveals lack of  
507 phylogenetic resolution. BMC Evol Biol. 2009;9:95.
- 508 14.Knaus BJ, Cronn R, Liston A, Pilgrim K, Schwartz MK. Mitochondrial genome sequences  
509 illuminate maternal lineages of conservation concern in a rare carnivore. BMC Ecol.  
510 2011;11:10.
- 511 15.Luo A, Zhang A, Ho SYW, Xu W, Zhang Y, Shi W, et al. Potential efficacy of  
512 mitochondrial genes for animal DNA barcoding: a case study using eutherian mammals.  
513 BMC Genomics. 2011;12:84.
- 514 16.Pacheco MA, Battistuzzi FU, Lentino M, Aguilar R, Kumar S, Escalante AA. Evolution of  
515 modern birds revealed by mitogenomics: timing the radiation and origin of major orders. Mol  
516 Biol Evol. 2011;28: 1927-1942.

- 517 17.Pamilo P, Nei M. Relationships between gene trees and species trees. *Mol Biol Evol.*  
518 1988;5(5), 568-583.
- 519 18.Maddison WP. Gene trees in species trees. *Syst Biol.* 1997;46(3), 523-536.
- 520 19.Zachos FE. Gene trees and species trees—mutual influences and interdependences of  
521 population genetics and systematics. *J Zool Syst Evol Res.* 2009;47(3), 209-218.
- 522 20.Bächli G. [Internet]. TaxoDros: the database on taxonomy of Drosophilidae, v. 1.04.  
523 Database 2011/1. Available from: <https://www.taxodros.uzh.ch/>.
- 524 21.Markow TA, O’Grady P. Reproductive ecology of *Drosophila*. *Funct Ecol.* 2008;22(5),  
525 747-759.
- 526 22.Markow TA, O’Grady P. *Drosophila: A guide to species identification and use.* Elsevier;  
527 2005.
- 528 23.O’Grady PM, DeSalle R. Phylogeny of the genus *Drosophila*. *Genetics.* 2018;209(1), 1-25.
- 529 24.Markow, TA. Host use and host shifts in *Drosophila*. *Curr Opin Insect Sci.* 2019;31: 139-  
530 145.
- 531 25.Oliveira, DCSG, Almeida, FC, O’Grady, PM, Armella MA, DeSalle R, Etges WJ.  
532 Monophyly, divergence times, and evolution of host plant use inferred from a revised  
533 phylogeny of the *Drosophila repleta* species group. *Mol Phylogenet Evol.* 2012;64(3), 533-  
534 544.
- 535 26.Morales-Hojas R, Vieira J. Phylogenetic Patterns of Geographical and Ecological  
536 Diversification in the Subgenus *Drosophila*. *PLoS ONE.* 2012;7(11): e49552.
- 537 27.Heed WB. Ecology and genetics of Sonoran desert *Drosophila*. In: Brussard PF, editors.  
538 *Ecological Genetics: The Interface. Proceedings in Life Sciences.* Springer, New York, NY;  
539 1978. pp. 109-126.
- 540 28.Barker JS, Starmer W. *Ecological Genetics and Evolution: The Cactus-Yeast-Drosophila*  
541 *Model System.* Academic Pr; 1982.

- 542 29.Heed WB, Mangan RL. Community ecology of Sonoran Desert *Drosophila*. In: Ashburner  
543 M., Carson H., Thompson J. N., editors. The genetics and biology of *Drosophila*. Academic,  
544 London; 1986. pp. 311-345.
- 545 30.Hasson E, Naveira H, Fontdevila A. The Breeding Sites of Argentinean Cactophilic Species  
546 of the *Drosophila*-Mulleri Complex (Subgenus *Drosophila*-Repleta Group). *Rev. Chil. Hist.*  
547 *Nat.* 1992;65(3), 319-326.
- 548 31.Fogleman JC, Danielson PB. Chemical interactions in the Cactus-Microorganism-  
549 *Drosophila* Model System of the Sonoran Desert. *Am Zool*, 2001;41(4), 877-889.
- 550 32.Guillén Y, Rius N, Delprat A, Williford A, Muyas F, Puig M, et al. Genomics of ecological  
551 adaptation in cactophilic *Drosophila*. *Genome Biol Evol.* 2014;7(1), 349-366.
- 552 33.De Panis DN, Padró J, Furió Tarí P, Tarazona S, Milla Carmona PS, Soto IM, et al.  
553 Transcriptome modulation during host shift is driven by secondary metabolites in desert  
554 *Drosophila*. *Mol Ecol.* 2016;25(18), 4534-4550.
- 555 34.Hasson E, De Panis D, Hurtado J, Mensch J. Host plant adaptation in cactophilic species of  
556 the *Drosophila buzzatii* cluster: fitness and transcriptomics. *J Hered.* 2019;110(1), 46-57.
- 557 35.Throckmorton LH. The Phylogeny, Ecology, and Geography of *Drosophila*. In: King RC,  
558 editors. Plenum Publishing Corporation, New York, New York; 1975. vol. 3, pp. 421-469.
- 559 36.Wasserman M. Evolution in the repleta group. In: Ashburner M, Carson HL, Thompson JN,  
560 editors. The genetics and Biology of *Drosophila*. Academic Press, London; 1982. pp. 61-139.
- 561 37.Vilela CA. A revision of the *Drosophila* species group. (Diptera-Drosophilidae). *Rev Bras*  
562 *Entomol.* 1983;27, 1±114.
- 563 38.Markow TA, O'Grady P. *Drosophila*: A guide to species identification and use. Elsevier;  
564 2006.
- 565 39.*Drosophila* 12 Genomes Consortium. Evolution of genes and genomes on the *Drosophila*  
566 phylogeny. *Nature.* 2007;450(7167), 203-218.



- 567 40. Ruiz A, Wasserman M. Evolutionary cytogenetics of the *Drosophila buzzatii* species  
568 complex. *Heredity* (Edinb). 1993;70(6), 582-596.
- 569 41. Tidon-Sklorz R, Sene FM. Two new species of the *Drosophila serido* sibling set (Diptera,  
570 *Drosophilidae*). *Iheringia Ser. Zool. Iheringia*. 2001;(90), 141-146.
- 571 42. Vilela CR, Sene FM. Two new Neotropical species of the *repleta* group of the genus  
572 *Drosophila* (Diptera, *Drosophilidae*). *Pap Avulsos Zool*. 1977;30(20), 295-299.
- 573 43. Patterson JT, Wheeler MR. Description of new species of the subgenera *Hirtodrosophila*  
574 and *Drosophila*. University of Texas. 1942.
- 575 44. Fontdevila A, Pla C, Hasson E, Wasserman M, Sanchez A, Naveira H, et al. *Drosophila*  
576 *koepferae*: a new member of the *Drosophila serido* (Diptera: *Drosophilidae*) superspecies  
577 taxon. *Ann Entomol Soc Am*. 1988;81(3), 380-385.
- 578 45. Tidon-Sklorz R, De Melo Sene F. *Drosophila seriema* n. sp.: new member of the *Drosophila*  
579 *serido* (Diptera: *Drosophilidae*) superspecies taxon. *Ann Entomol Soc Am*. 1995;88(2), 139-  
580 142.
- 581 46. Fontdevila A. Founder Effects in Colonizing Populations: The Case of *Drosophila buzzatii*.  
582 In: Fontdevila A, editors. *Evolutionary Biology of Transient Unstable Populations*. Springer,  
583 New York, NY; 1989. pp. 74-95.
- 584 47. Manfrin MH, Sene FM. Cactophilic *Drosophila* in South America: A model for  
585 evolutionary studies. *Genetica*, 2006;126(1-2), 57-75.
- 586 48. Barrios-Leal DY, Neves-Da-Rocha J, Manfrin MH. Genetics and Distribution Modeling:  
587 The Demographic History of the Cactophilic *Drosophila buzzatii* Species Cluster in Open  
588 Areas of South America. *J Hered*. 2019;110(1), 22-33.
- 589 49. Hurtado J, Almeida F, Revale S, Hasson E. Revised phylogenetic relationships within the  
590 *Drosophila buzzatii* species cluster (Diptera: *Drosophilidae*: *Drosophila repleta* group) using  
591 genomic data. *Arthropod Systematics and Phylogeny*. 2019; Forthcoming.

- 592 50.Hasson E, Soto IM, Carreira VP, Corio C, Soto EM, Betti M. Host plants, fitness and  
593 developmental instability in a guild of cactophilic species of the genus *Drosophila*. In: Santos  
594 EB, editors. Ecotoxicology research developments. Nova Science Publishers, Inc; 2009. pp.  
595 89-109.
- 596 51.Ruiz A, Cansian AM, Kuhn GC, Alves MA, Sene FM. The *Drosophila* serido speciation  
597 puzzle: putting new pieces together. *Genetica*. 2000;108(3), 217-227.
- 598 52.Manfrin MH, de Brito ROA, Sene FM. Systematics and Evolution of the *Drosophila*  
599 *buzzatii* (Diptera: Drosophilidae) Cluster Using mtDNA. *Ann Entomol Soc Am*. 2001;94(3),  
600 333-346.
- 601 53.Franco FF, Silva-Bernardi ECC, Sene FM, Hasson ER, Manfrin MH. Intra-and interspecific  
602 divergence in the nuclear sequences of the clock gene period in species of the *Drosophila*  
603 *buzzatii* cluster. *J Zool Syst Evol Res*. 2010;48(4), 322-331.
- 604 54.Rodríguez-Trelles F, Alarcón L, Fontdevila A. Molecular evolution and phylogeny of the  
605 *buzzatii* complex (*Drosophila repleta* group): A maximum-likelihood approach. *Mol Biol*  
606 *Evol*. 2000;17(7), 1112-1122.
- 607 55.de Lima LG, Svartman M, Kuhn GCS. Dissecting the Satellite DNA Landscape in Three  
608 Cactophilic *Drosophila* Sequenced Genomes. *G3 (Bethesda)*. 2017;7(8), 2831-2843.
- 609 56.Langmead B, Salzberg SL. Fast gapped-read alignment with Bowtie 2. *Nat Methods*.  
610 2012;9(4), 357-359.
- 611 57.Li H, Handsaker B, Wysoker A, Fennell T, Ruan J, Homer N, et al. The sequence  
612 alignment/map format and SAMtools. *Bioinformatics*. 2009;25(16), 2078-2079.
- 613 58.Chevreur B, Pfisterer T, Drescher B, Driesel AJ, Müller WEG, Wetter T. et al. Using the  
614 miraEST assembler for reliable and automated mRNA transcript assembly and SNP detection  
615 in sequenced ESTs. *Genome Res*. 2004;14(6), 1147-1159.
- 616 59.Sievers F, Higgins DG. Clustal omega. *Curr Protoc Bioinformatics*. 2014;48(1), 3-13.

- 617 60.Kumar S, Stecher G, Li M, Knyaz C, Tamura K. MEGA X: Molecular evolutionary  
618 genetics analysis across computing platforms. *Mol Biol Evol.* 2018;35(6), 1547-1549.
- 619 61.Bernt M, Donath A, Jühling F, Externbrink F, Florentz C, Fritzscht G.et al. MITOS:  
620 Improved de novo metazoan mitochondrial genome annotation. *Mol Phylogenet Evol.*  
621 2013;69(2), 313-319.
- 622 62.Robinson JT, Thorvaldsdóttir H, Winckler W, Guttman M, Lander ES, Getz G, et al.  
623 Integrated genomics viewer. *Nat Biotechnol.* 2011;29(1), 24–26.
- 624 63.Yang Z. PAML 4: a program package for phylogenetic analysis by maximum likelihood.  
625 *Mol Biol Evol.* 2007;24: 1586-1591.
- 626 64.Gouy M, Guindon S, Gascuel O. Sea view version 4: A multiplatform graphical user  
627 interface for sequence alignment and phylogenetic tree building. *Mol Biol Evol.* 2010;27(2),  
628 221-224.
- 629 65.Lanfear R, Frandsen PB, Wright AM, Senfeld T, Calcott B. Partitionfinder 2: New methods  
630 for selecting partitioned models of evolution for molecular and morphological phylogenetic  
631 analyses. *Mol Biol Evol.* 2017;34(3), 772-773.
- 632 66.Ronquist F, Huelsenbeck JP. MrBayes 3: Bayesian phylogenetic inference under mixed  
633 models. *Bioinformatics.* 2003;19(12), 1572-1574.
- 634 67.Rambaut A, Drummond AJ, Xie D, Baele G, Suchard MA. Posterior Summarization in  
635 Bayesian Phylogenetics Using Tracer 1.7. *Syst Biol.* 2018;67(5), 901-904.
- 636 68.Rambaut A. FigTree: Tree Figure Drawing Tool [software]. 2007. Available online from:  
637 <http://tree.bio.ed.ac.uk/software/figtree>.
- 638 69.Stamatakis A. RAxML version 8: A tool for phylogenetic analysis and post-analysis of  
639 large phylogenies. *Bioinformatics.* 2014;30(9), 1312-1313.
- 640 70.Suchard MA, Lemey P, Baele G, Ayres DL, Drummond AJ, Rambaut A. Bayesian  
641 phylogenetic and phylodynamic data integration using BEAST 1.10. *Virus Evol.* 2018;4,

- 642 vey016.
- 643 71.Haag-Liautard C, Coffey N, Houle D, Lynch M, Charlesworth B, Keightley PD. Direct  
644 estimation of the mitochondrial DNA mutation rate in *Drosophila melanogaster*. *PLoS Biol.*  
645 2008;6(8), 1706-1714.
- 646 72.D'Onorio de Meo P, D'Antonio M, Griggio F, Lupi R, Borsani M, Pavesi G, et al. MitoZoa  
647 2.0: a database resource and search tools for comparative and evolutionary analyses of  
648 mitochondrial genomes in Metazoa. *Nucleic Acids Res.* 2011;40(D1), D1168-D1172.
- 649 73.Stoletzki N, Eyre-Walker A. Synonymous codon usage in *Escherichia coli*: selection for  
650 translational accuracy. *Mol Biol Evol.* 2007;24: 374-81.
- 651 74.Franco FF, Manfrin MH. Recent demographic history of cactophilic *Drosophila* species can  
652 be related to Quaternary palaeoclimatic changes in South America. *J Biogeogr.* 2013;40(1),  
653 142-154.
- 654 75.Subramanian S. Temporal trails of natural selection in human mitogenomes. *Mol Biol Evol.*  
655 2009;26: 715-717.
- 656 76.Subramanian S, Denver DR, Millar CD, Heupink T, Aschrafi A, Emslie SD, et al. High  
657 mitogenomic evolutionary rates and time dependency. *Trends Genet.* 2009;25: 482-486.
- 658 77.Ho SY, Lanfear R, Bormham L, Phillips MJ, Soubrier J, Rodrigo AG, et al. Time-dependent  
659 rates of molecular evolution. *Mol Ecol.* 2011;20: 3087-3101.
- 660 78.Ballard JWO. Comparative genomics of mitochondrial DNA in *Drosophila simulans*. *J Mol*  
661 *Evol.* 2000;51(1), 64-75.
- 662 79.Brown WM, George M, Wilson AC. Rapid evolution of animal mitochondrial DNA. *Proc*  
663 *Natl Acad Sci U S A.* 1979;76(4), 1967-1971.
- 664 80.Toews, DP, Brelsford A. The biogeography of mitochondrial and nuclear discordance in  
665 animals. *Molecular Ecology.* 2012;21(16), 3907-3930.
- 666 81.Powell JR. Interspecific cytoplasmic gene flow in the absence of nuclear gene flow:

- 667 evidence from *Drosophila*. *Proc Natl Acad Sci U S A*. 1983;80(2), 492-495.
- 668 82.Bachtrog D, Thornton K, Clark A, Andolfatto P. Extensive introgression of mitochondrial  
669 DNA relative to nuclear genes in the *Drosophila yakuba* species group. *Evolution (N Y)*.  
670 2006;60(2), 292-302.
- 671 83.Aubert J, Solignac M. Experimental evidence for mitochondrial DNA introgression between  
672 *Drosophila* species. *Evolution (N Y)*. 1990;44(5), 1272-1282.
- 673 84.Wong A, Jensen JD, Pool JE, Aquadro CF. Phylogenetic incongruence in the *Drosophila*  
674 *melanogaster* species group. *Mol Phylogenet Evol*. 2007;43(3), 1138-1150.
- 675 85.Chan KMA, Levin SA. Leaky prezygotic isolation and porous genomes: rapid introgression  
676 of maternally inherited DNA. *Evolution (N Y)*. 2005;59, 720–729.
- 677 86.Keck BP, Near TJ. Geographic and temporal aspects of mitochondrial replacement in  
678 *Nothonotus darters* (Teleostei: Percidae: Etheostominae). *Evolution*. 2010;64(5), 1410-428.
- 679 87.Gómez GA, Hasson E. Transpecific polymorphisms in an inversion linked esterase locus in  
680 *Drosophila buzzatii*. *Mol Biol Evol*. 2003;20(3), 410-423.
- 681 88.Piccinali R, Aguadé M, Hasson E. Comparative molecular population genetics of the *Xdh*  
682 locus in the cactophilic sibling species *Drosophila buzzatii* and *D. koepferae*. *Mol Biol Evol*.  
683 2004;21(1), 141-152.
- 684 89.Madi-Ravazzi L, Bicudo HE, Manzato JA. Reproductive compatibility and chromosome  
685 pairing in the *Drosophila buzzatii* complex. *Cytobios*. 1997;89(356), 21-30.
- 686 90.Machado LPB, Madi-Ravazzi L, Tadei WJ. Reproductive relationships and degree of  
687 synapsis in the polytene chromosomes of the *Drosophila buzzatii* species cluster. *Braz J Biol*.  
688 2006;66(1B), 279-293.
- 689 91.Soto IM, Carreira VP, Fanara JJ, Hasson E. Evolution of male genitalia: environmental and  
690 genetic factors affect genital morphology in two *Drosophila* sibling species and their hybrids.  
691 *BMC Evol Biol*. 2007;7(1), 77.

- 692 92.Soto EM, Soto IM, Carreira VP, Fanara JJ, Hasson E. Host-related life history traits in  
693 interspecific hybrids of cactophilic *Drosophila*. *Entomol Exp Appl*. 2008;126(1), 18-27.
- 694 93.Iglesias PP, Hasson E. The role of courtship song in female mate choice in South American  
695 Cactophilic *Drosophila*. *PLoS ONE*. 2017;12(5), e0176119.
- 696 94.Haffer J. Speciation in Amazonian forest birds. *Science*. 1969;165: 131-137.
- 697 95.Endler JA. Problems in distinguishing historical from ecological factors in biogeography.  
698 *Am Zool*. 1982;22(2), 441-452.
- 699 96.Rull V. Neotropical biodiversity: timing and potential drivers. *Trends Ecol Evol*.  
700 2011;26(10): 508-513.
- 701 97.Hoorn C, Wesselingh FP, Ter Steege H, Bermudez MA, Mora A, Sevink J, et al. Response  
702 to Origins of Biodiversity. *Science* 2011;331: 399-400.
- 703 98.Lagomarsino LP, Condamine FL, Antonelli A, Mulch A, Davis CC. The abiotic and biotic  
704 drivers of rapid diversification in Andean bellflowers (*Campanulaceae*). *New Phytol*.  
705 2016;210: 1430-1442.
- 706 99.Lisiecki LE, Raymo ME. A Pliocene-Pleistocene stack of globally distributed benthic stable  
707 oxygen isotope records. *Paleoceanography*. 2005;20, 1-17.
- 708 100.Mosblech NA, Bush MB, Gosling WD, Hodell D, Thomas L, Van Calsteren P. North  
709 Atlantic forcing of Amazonian precipitation during the last ice age. *Nat Geosci*. 2012;5(11),  
710 817.
- 711 101.Gosling WD, Bush MB, Hanselman JA, Chepstow-Lusty A. Glacial-interglacial changes  
712 in moisture balance and the impact on vegetation in the southern hemisphere tropical Andes  
713 (Bolivia/ Peru). *Palaeogeogr Palaeoclimatol Palaeoecol*. 2008;259, 35-50.
- 714 102.Quipildor VB, Kitzberger T, Ortega-Baes P, Quiroga MP, Premoli AC. Regional climate  
715 oscillations and local topography shape genetic polymorphisms and distribution of the giant  
716 columnar cactus *Echinopsis terscheckii* in drylands of the tropical Andes. *J Biogeogr*.

- 717 2017;45: 116-126.
- 718 103.Zhang S, Li T, Chang F, Yu Z, Xiong Z, Wang H. Correspondence between the ENSO-  
719 like state and glacial-interglacial condition during the past 360 kyr. *Chin. J. Oceanol. Limnol.*  
720 2016;35(5), 1018-1031.
- 721 104.Fritz SC, Baker PA, Tapia P, Spanbauer T, Westover K. Evolution of the Lake Titicaca  
722 basin and its diatom flora over the last ~370,000 years. *Palaeogeogr Palaeoclimatol*  
723 *Palaeoecol.* 2012;317-318: 93-103.
- 724 105.Hughes PD, Gibbard PL. Global glacier dynamics during 100 ka Pleistocene glacial cycles.  
725 *Quat Res.* 2018;90(1), 222-243.
- 726 106.Friedrich T, Timmermann A, Tigchelaar M, Timm OE, Ganopolski A. Nonlinear climate  
727 sensitivity and its implications for future greenhouse warming. *Sci Adv.* 2016;2(11),  
728 e1501923.
- 729 107.Petit JR, Jouzel J, Raynaud D, Barkov NI, Barnola JM, Basile I, et al. Climate and  
730 atmospheric history of the past 420,000 years from the Vostok ice core, Antarctica. *Nature.*  
731 1999;399: 429-436.
- 732 108.Rincón-Martínez D, Lamy F, Contreras S, Leduc G, Bard E, Saukel C, et al. More humid  
733 interglacials in Ecuador during the past 500 kyr linked to latitudinal shifts of the equatorial  
734 front and the Intertropical Convergence Zone in the eastern tropical Pacific.  
735 *Paleoceanography.* 2010;25, PA2210.

## 736 **Supporting Information**

### 737 **Captions**

738 **S1 Text. Pair of primers designed for regions conserved across the six mitogenomes.**

739 **S1 Table. Codon usage for each mitogenome of the *buzzatii* cluster species.**

740 **S2 Table. Genetic divergence among species of the *buzzatii* cluster.** Estimates are shown for  
741 each pairwise comparison between species.

742 **S1 Fig. Phylogenetic hypotheses for the *buzzatii* cluster species recovered by each**  
743 **mitochondrial gene using Bayesian Inference searches.**

744 **S2 Fig. Paleoclimatic records of the last 500,000 years.** Ages in the top are indicated as  $10^3$  years  
745 (kyrs). Gradated shading area indicates divergence age estimates. Marine Isotope Stages (MIS) are  
746 labeled according to Lisiecki and Raymo (2005). Shaded vertical areas correspond to glacial periods  
747 whereas white areas correspond to interglacials or interstadials. Glacial periods correspond to cold  
748 and dry conditions in the western slopes of the Western Andes, and cold and wetter conditions in  
749 the eastern slopes of the Eastern Andes and the Altiplano. **A.** Globally-averaged surface air  
750 temperature anomaly reconstructed from proxy and model data for the last eight glacial cycles [106].  
751 **B.** CO<sub>2</sub> concentration based on Vostok Ice Core data [107]. **C.** Iron accumulation rates (AR Fe)  
752 reflecting changes in terrigenous sediment input to ODP Site 1239D, Equatorial Pacific [108]. **D.** %  
753 of CaCO<sub>3</sub> from Site LT01-2B indicating changes in water balance at Lake Titicaca Basin, Bolivia  
754 (modified from 104).



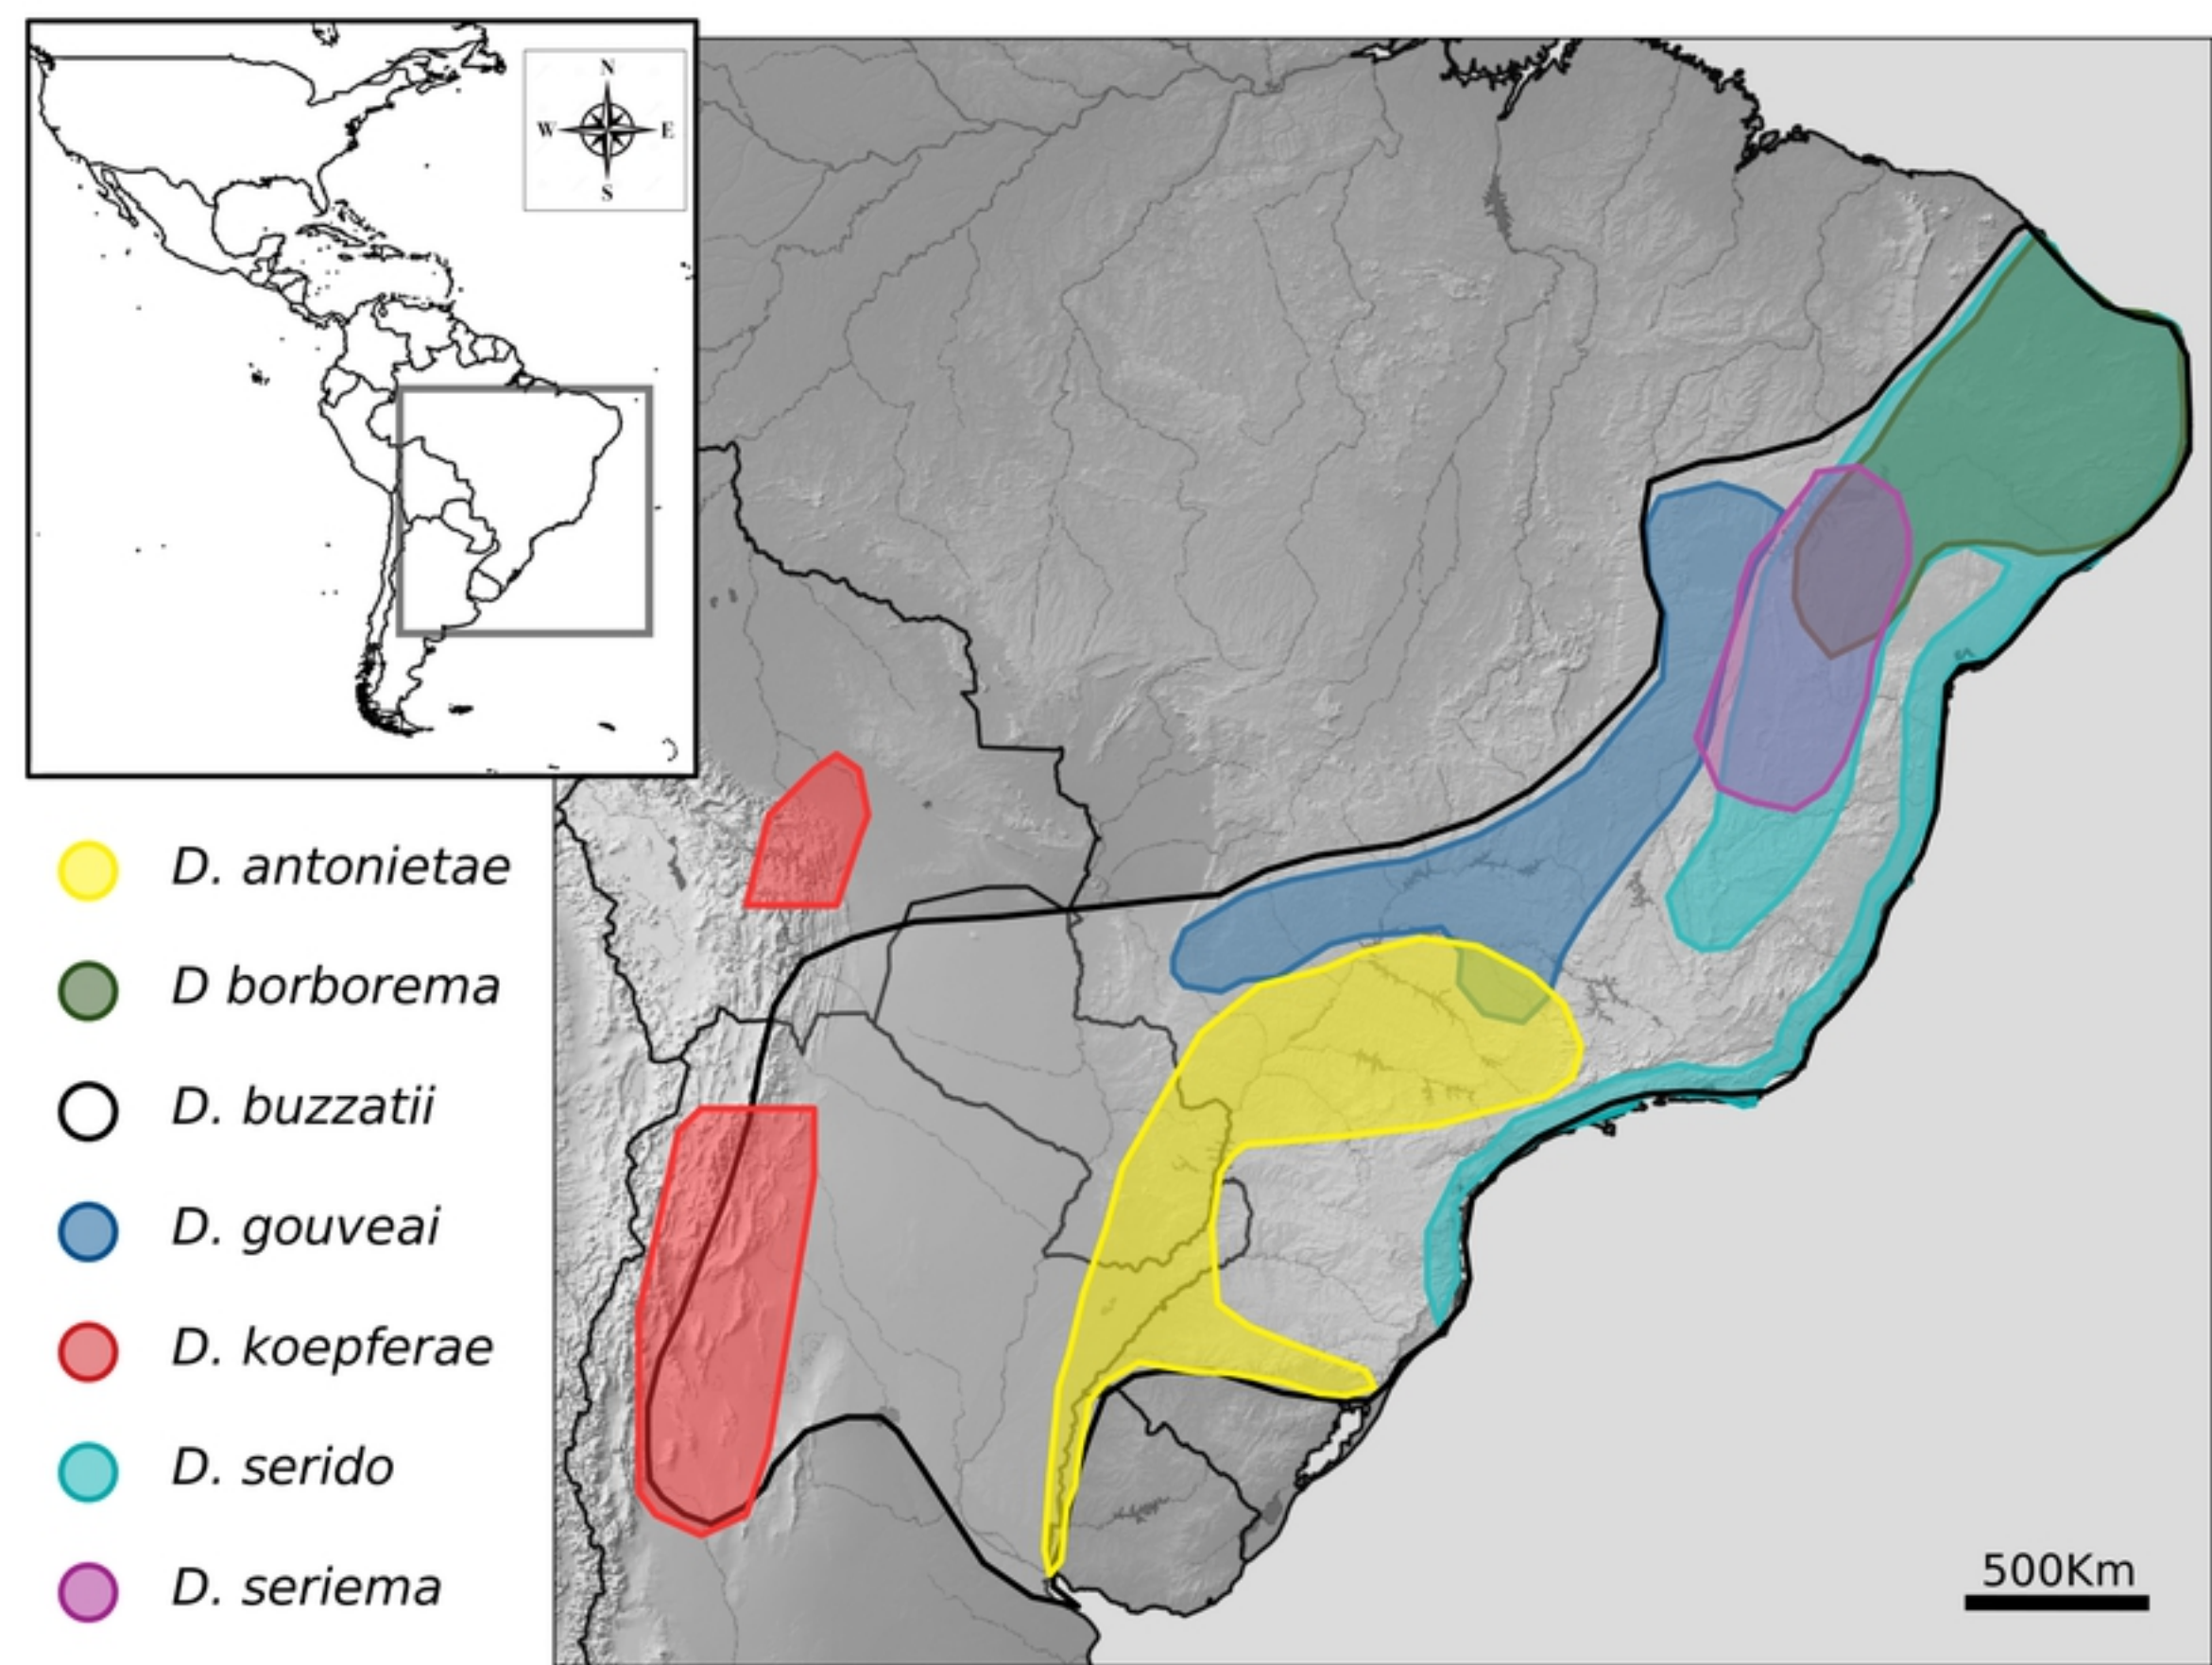

Fig 1

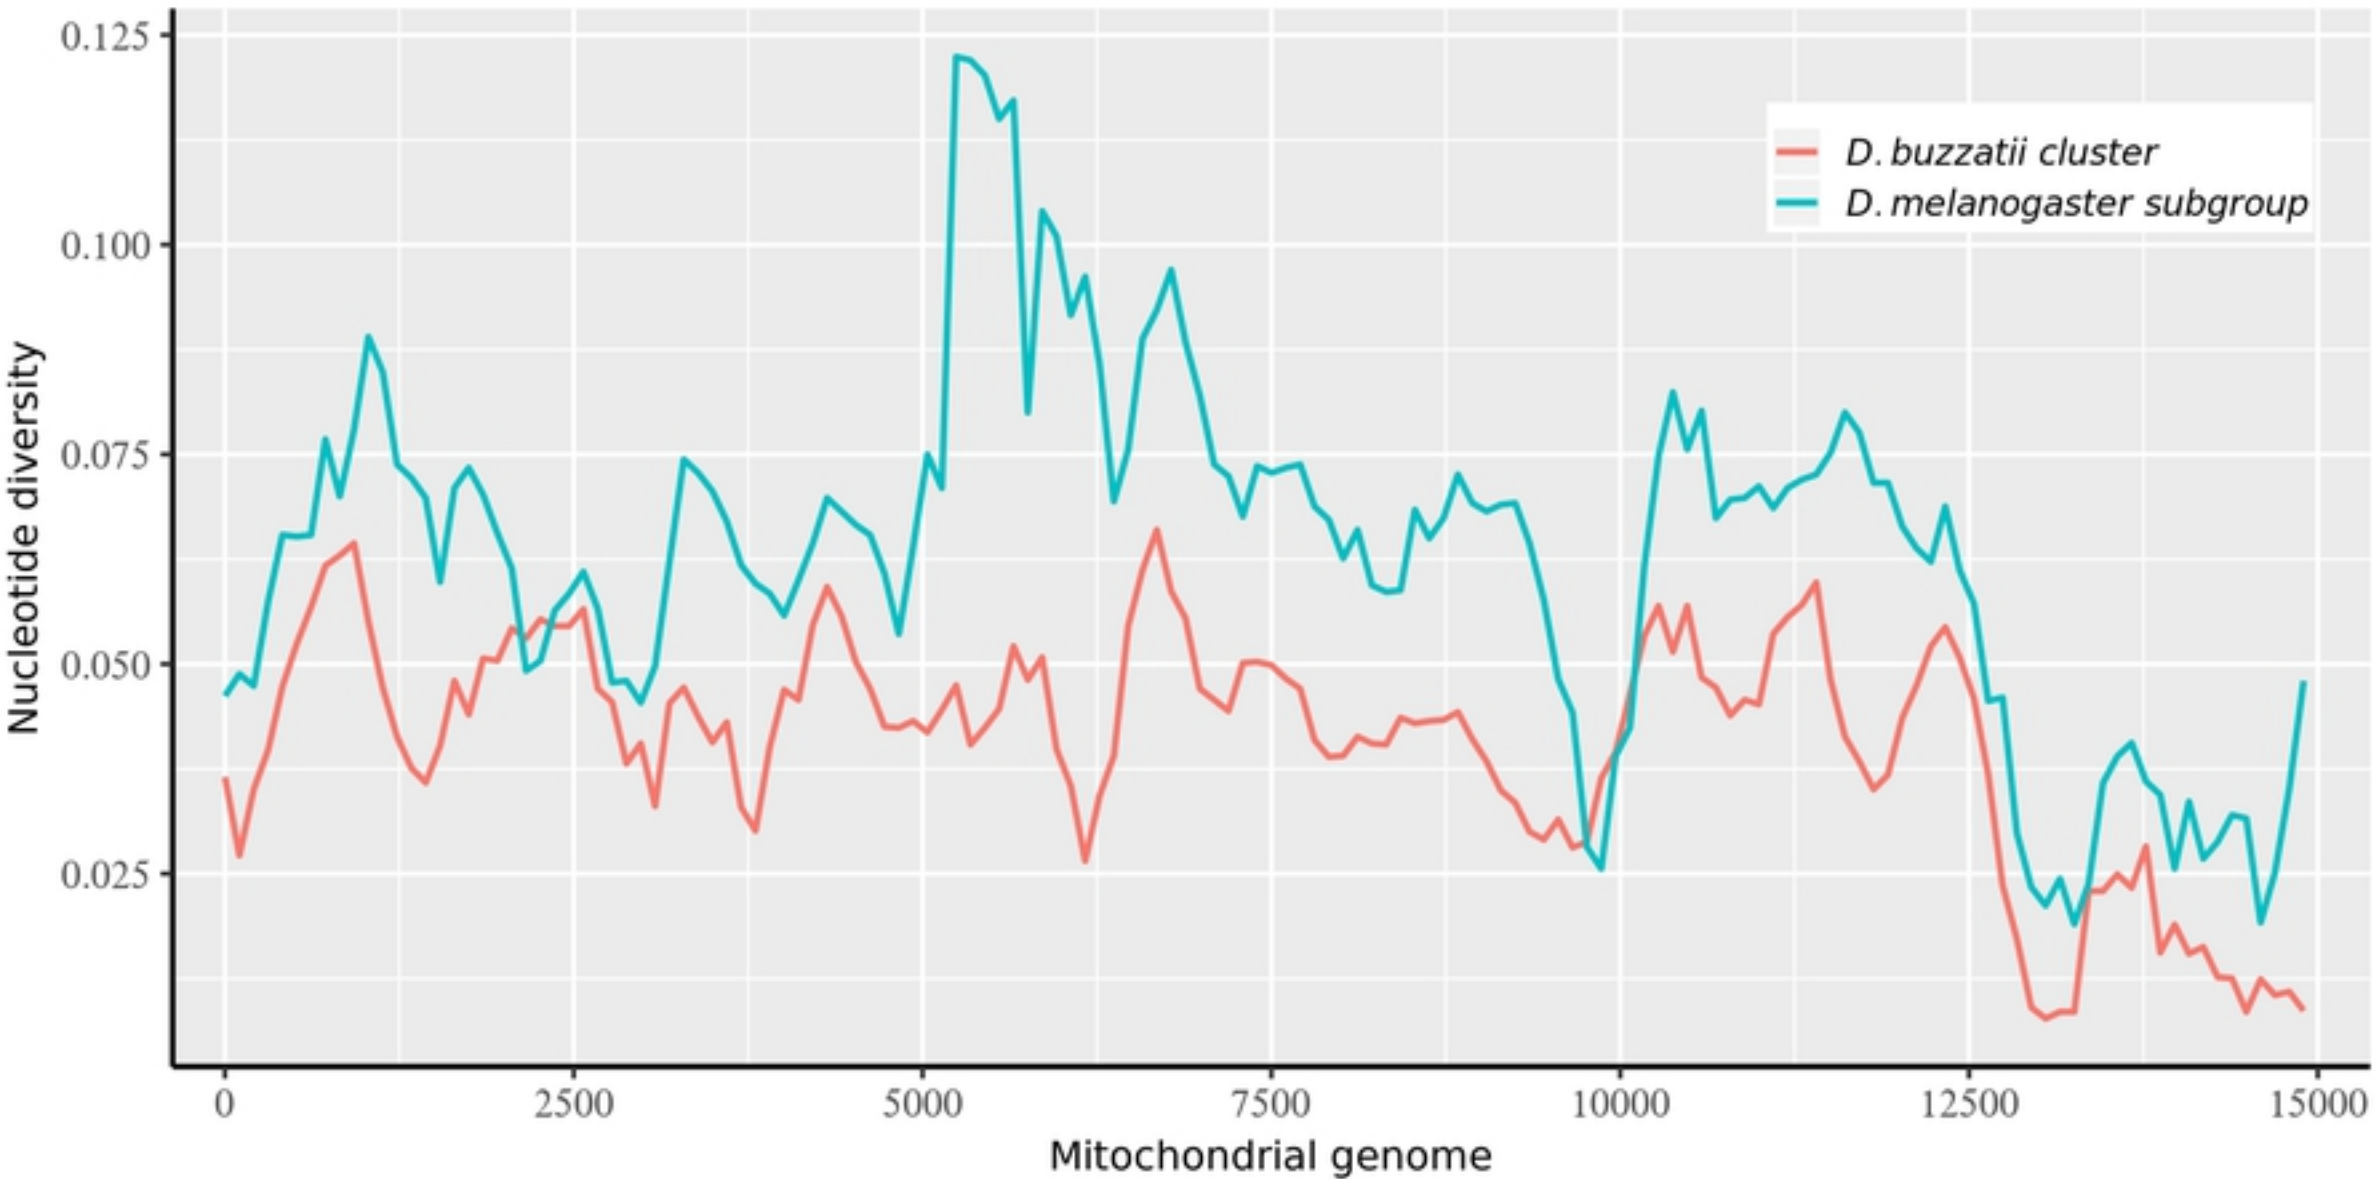

Fig 2

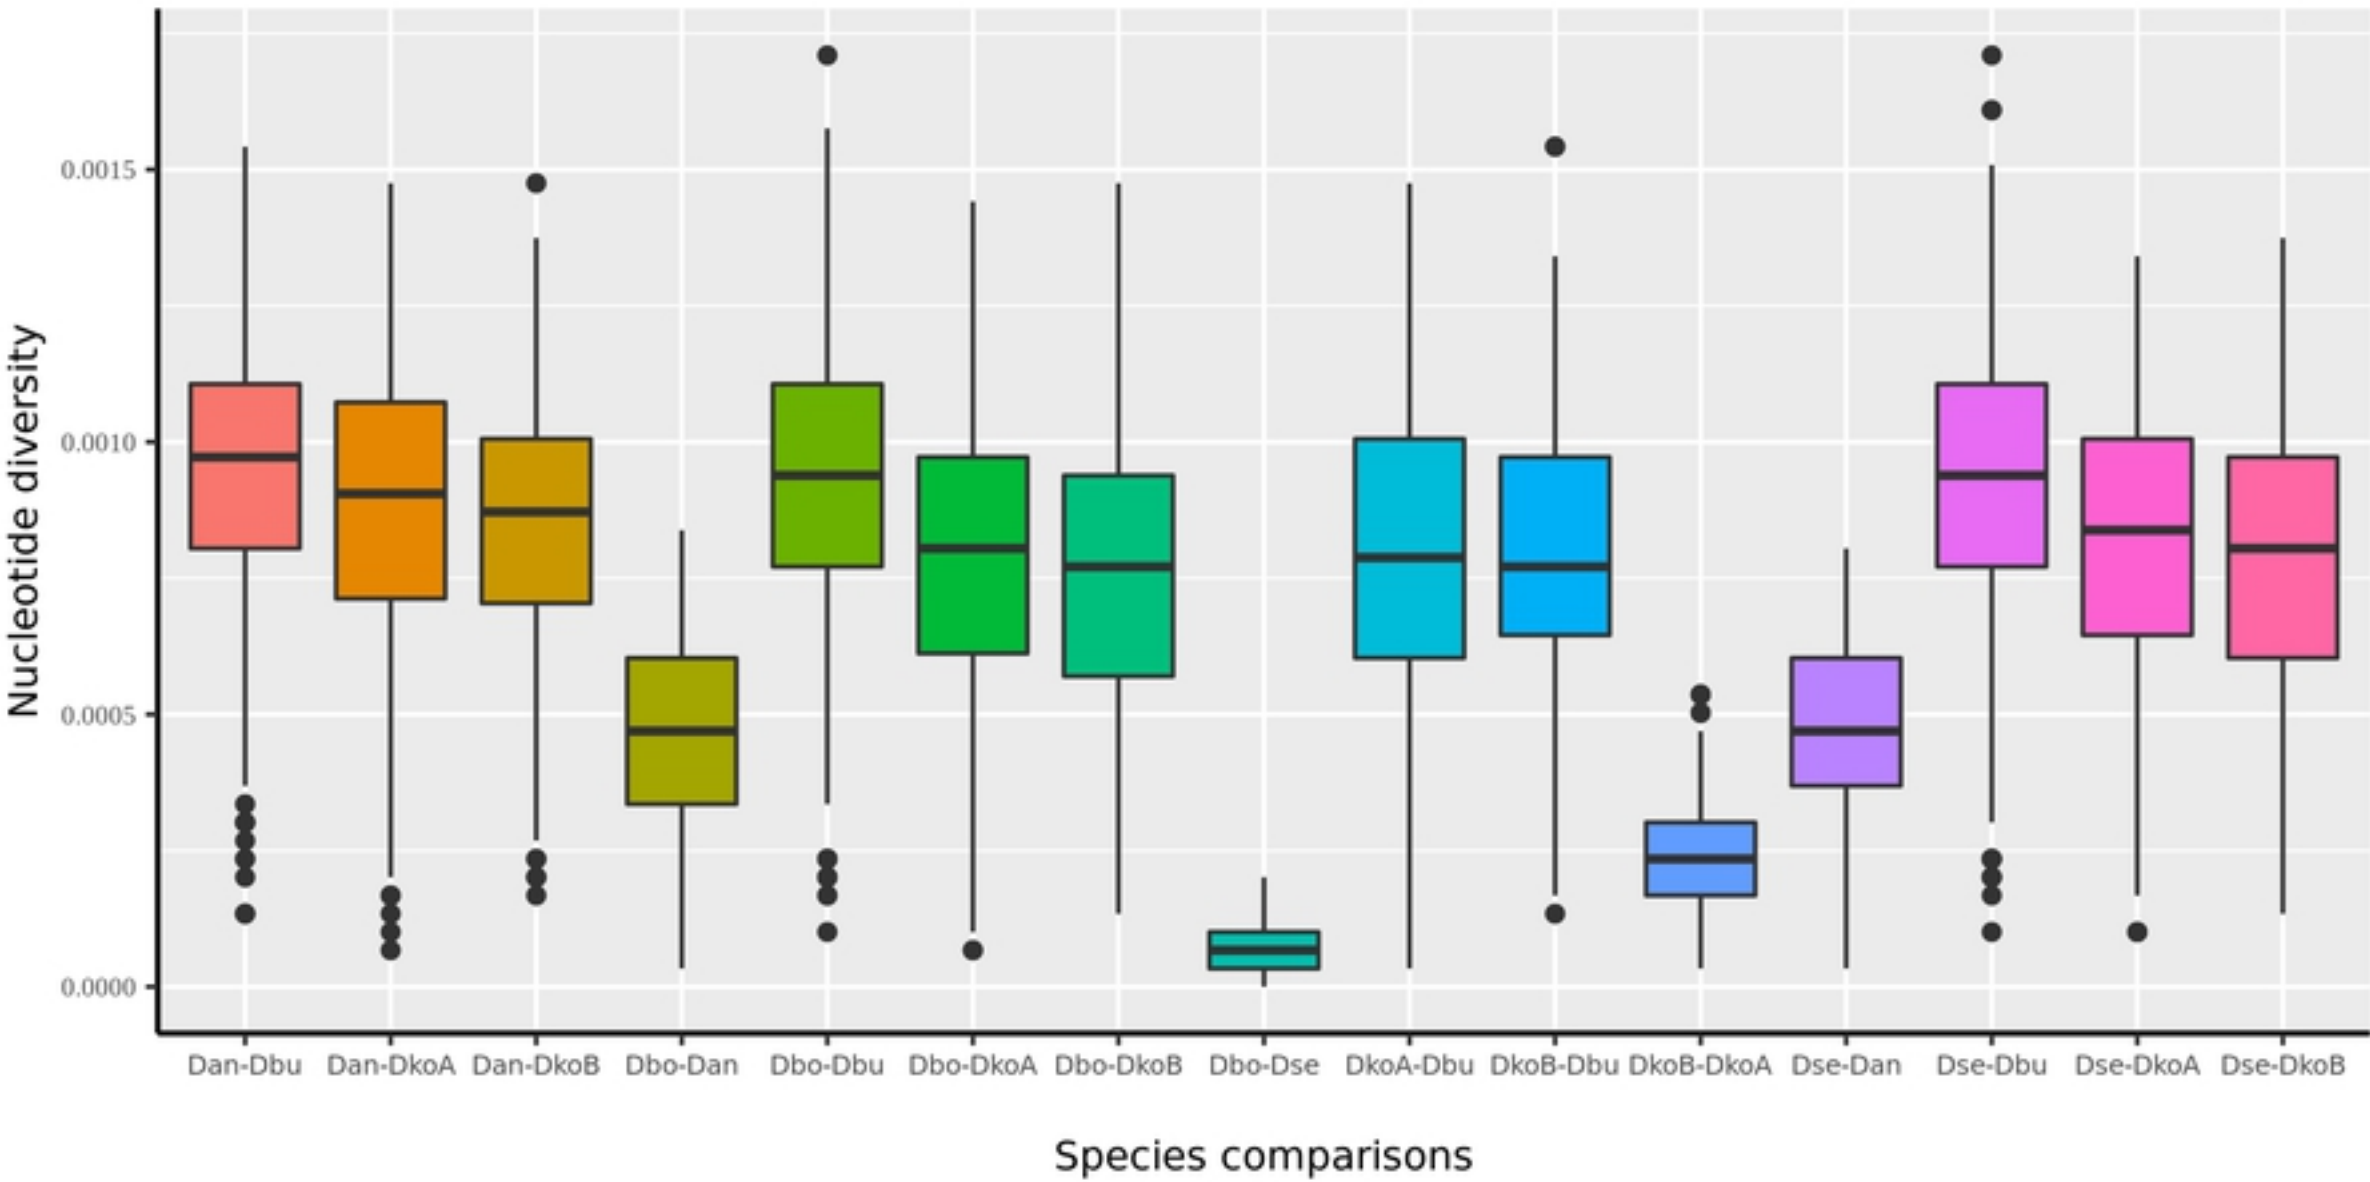

Fig 3

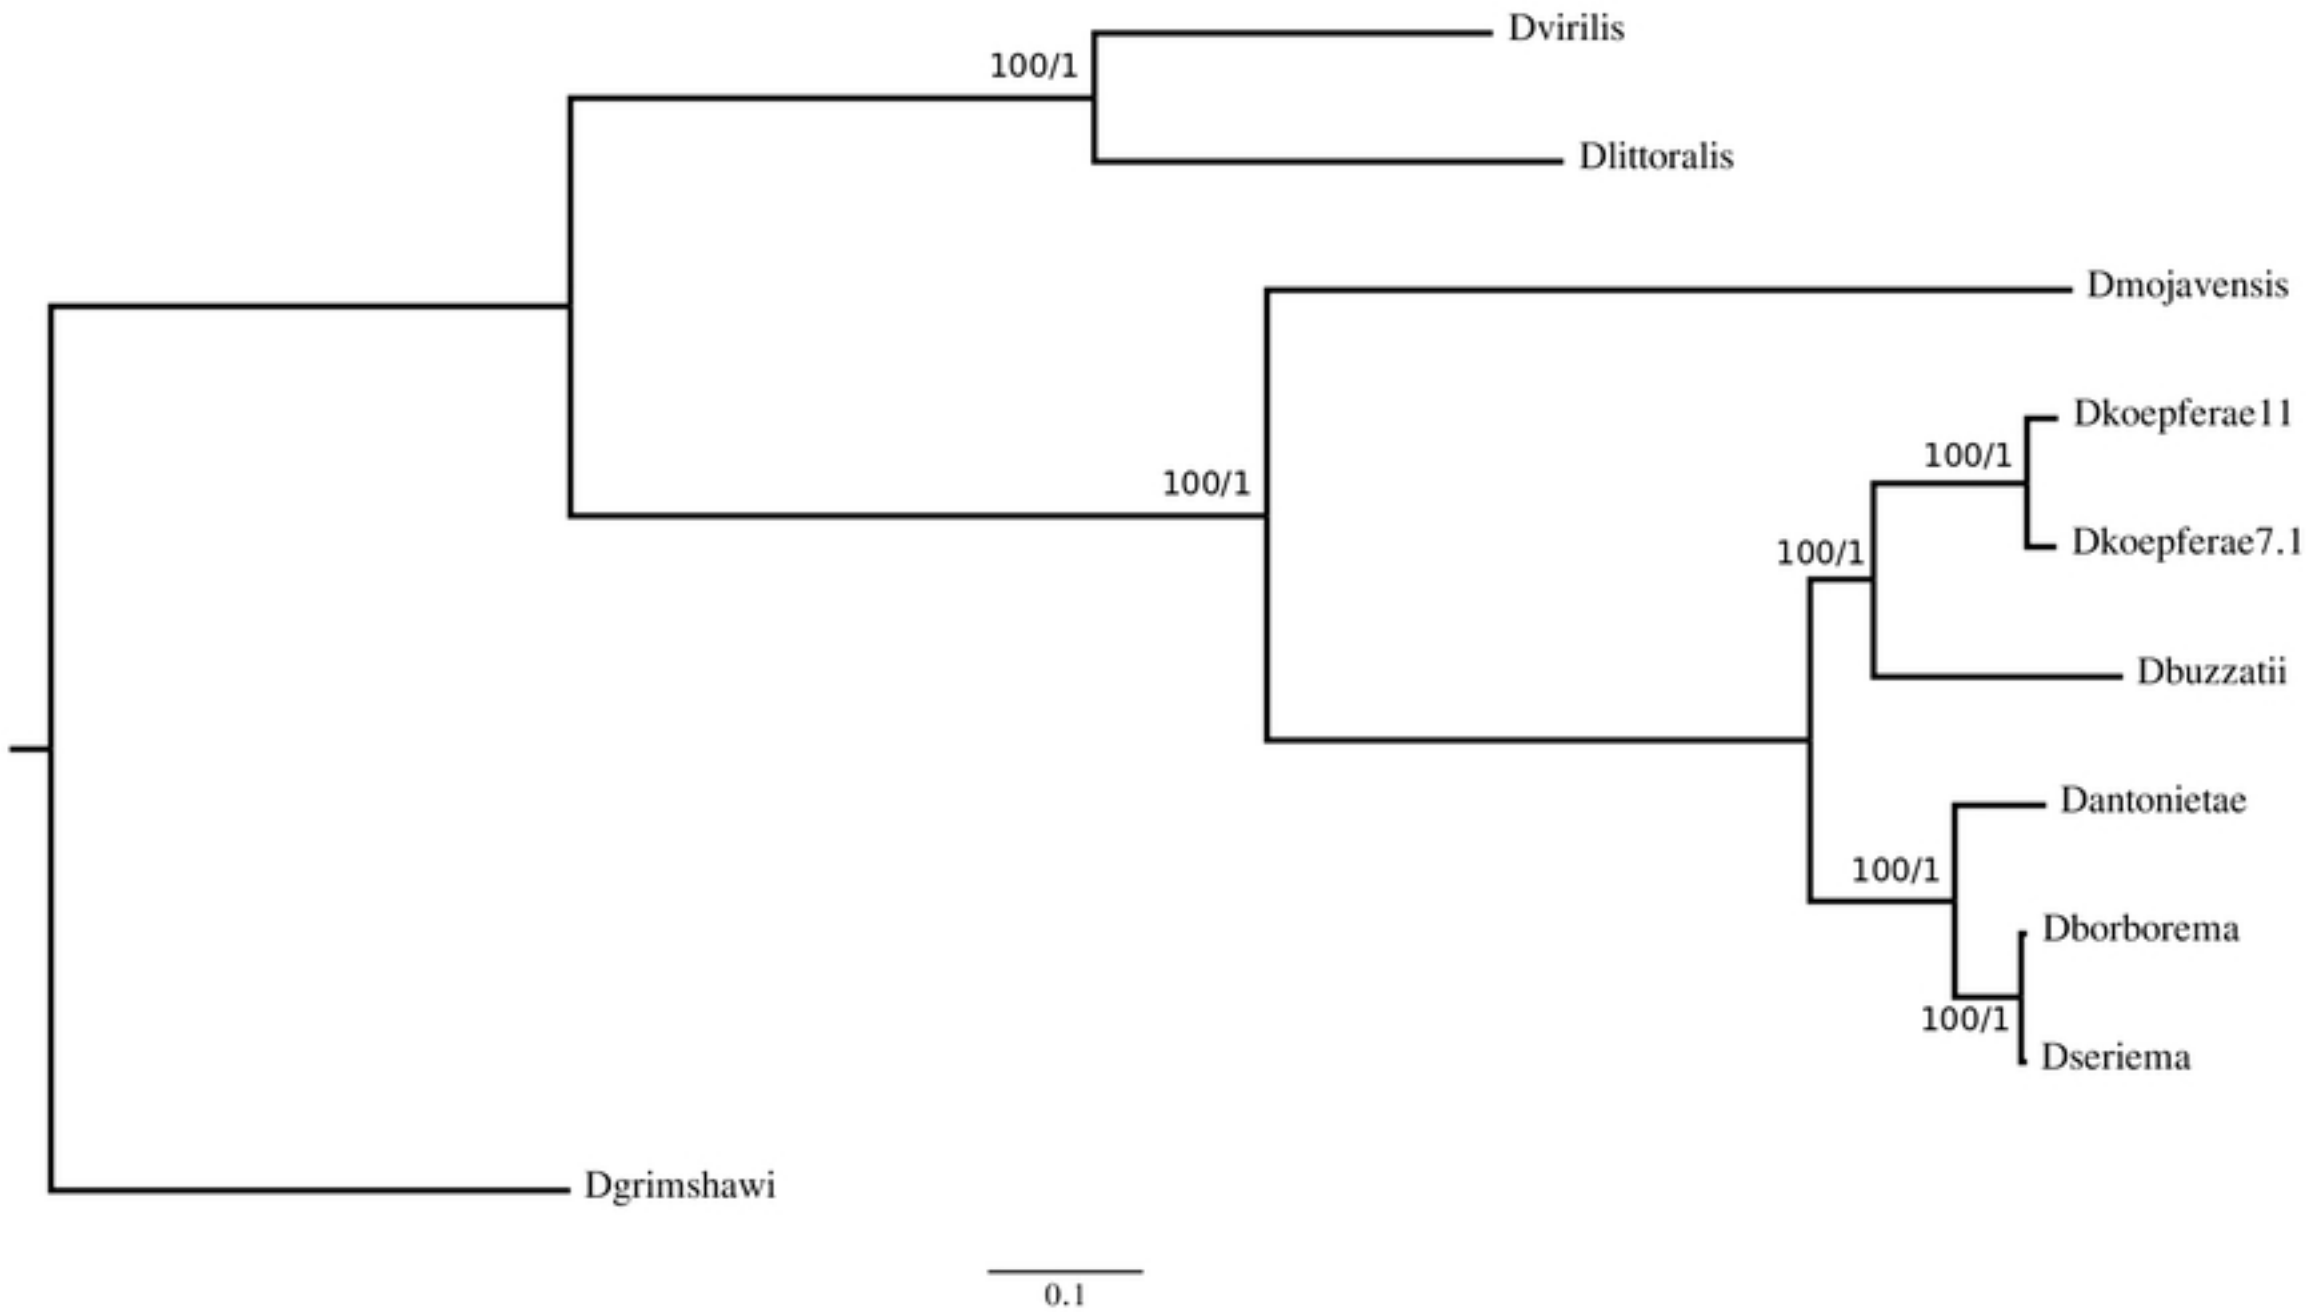

Fig 4

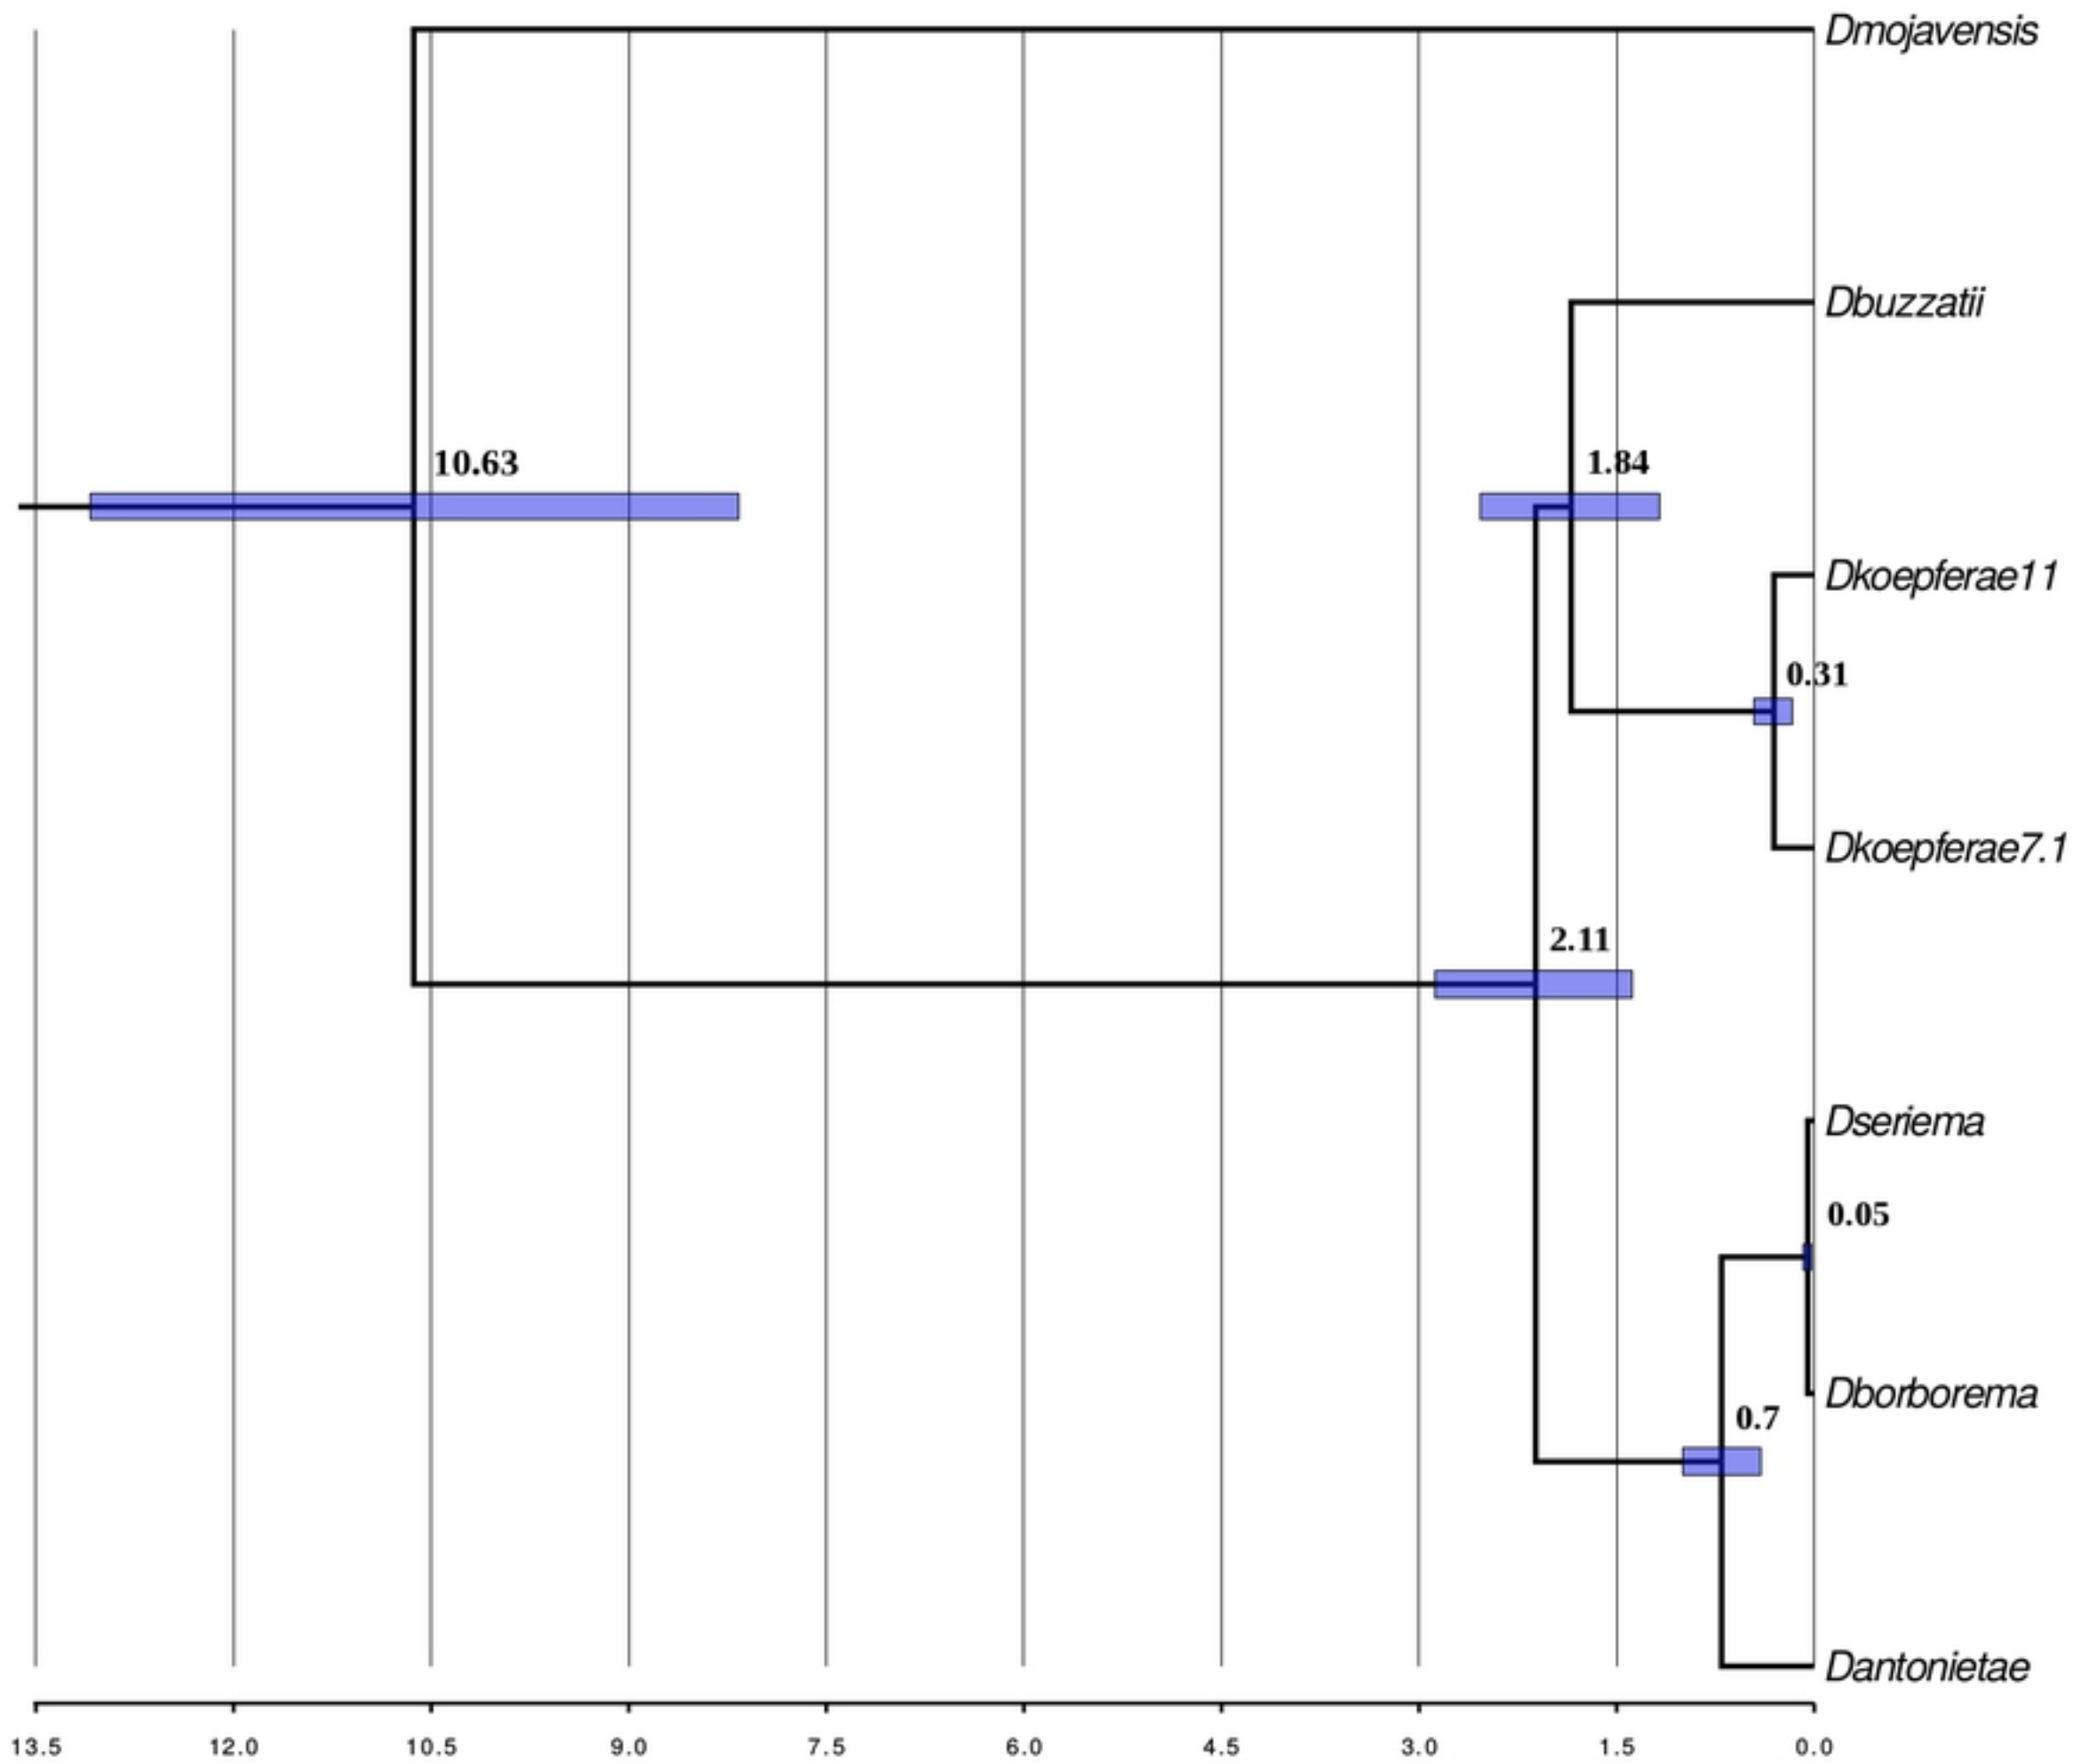

Fig 5
